# Supplementary material for: Impact of sharing electronic health records with patients on the quality and safety of care: a systematic review and narrative synthesis protocol
Source: PubMed Central journal article supplement (PMC6091908; doi:10.1136/bmjopen-2017-020387), 2018-08-13
Supplement: bmjopen-2017-020387.draft_revisions.pdf [file bmjopen-2017-020387.draft_revisions.pdf]

# BMJ Open

BMJ Open is committed to open peer review. As part of this commitment we make the peer review history of every article we publish publicly available.

When an article is published we post the peer reviewers' comments and the authors' responses online. We also post the versions of the paper that were used during peer review. These are the versions that the peer review comments apply to.

The versions of the paper that follow are the versions that were submitted during the peer review process. They are not the versions of record or the final published versions. They should not be cited or distributed as the published version of this manuscript.

BMJ Open is an open access journal and the full, final, typeset and author-corrected version of record of the manuscript is available on our site with no access controls, subscription charges or pay-per-view fees (<http://bmjopen.bmj.com>).

If you have any questions on BMJ Open's open peer review process please email [info.bmjopen@bmj.com](mailto:info.bmjopen@bmj.com)

# BMJ Open

## Applying an analytical framework to map the impact of electronic data sharing on quality of care and safety: protocol for a systematic review

|                               |                                                                                                                                                                                                                                                                                                                                                                                                                                                                                                                                                                                                                                                                                                                                                                      |
|-------------------------------|----------------------------------------------------------------------------------------------------------------------------------------------------------------------------------------------------------------------------------------------------------------------------------------------------------------------------------------------------------------------------------------------------------------------------------------------------------------------------------------------------------------------------------------------------------------------------------------------------------------------------------------------------------------------------------------------------------------------------------------------------------------------|
| Journal:                      | <i>BMJ Open</i>                                                                                                                                                                                                                                                                                                                                                                                                                                                                                                                                                                                                                                                                                                                                                      |
| Manuscript ID                 | bmjopen-2017-020387                                                                                                                                                                                                                                                                                                                                                                                                                                                                                                                                                                                                                                                                                                                                                  |
| Article Type:                 | Protocol                                                                                                                                                                                                                                                                                                                                                                                                                                                                                                                                                                                                                                                                                                                                                             |
| Date Submitted by the Author: | 01-Nov-2017                                                                                                                                                                                                                                                                                                                                                                                                                                                                                                                                                                                                                                                                                                                                                          |
| Complete List of Authors:     | Neves, Ana Luisa; Imperial College London, Center for Health Policy, Institute of Global Health Innovation<br>Carter, Alexander; Imperial College London, Center for Health Policy, Institute of Global Health Innovation<br>Freise, Lisa; Imperial College London, Center for Health Policy, Institute of Global Health Innovation<br>Laranjo, Liliana; Macquarie University Faculty of Science, Australian Institute of Health Innovation; Universidade Nova de Lisboa, Centro de Investigação em Saúde Pública, Escola Nacional de Saúde Pública<br>Darzi, Ara; Imperial College London, Center for Health Policy, Institute of Global Health Innovation<br>Mayer, Erik; Imperial College London, Center for Health Policy, Institute of Global Health Innovation |
| Keywords:                     | Health informatics < BIOTECHNOLOGY & BIOINFORMATICS, Information technology < BIOTECHNOLOGY & BIOINFORMATICS, Quality in health care < HEALTH SERVICES ADMINISTRATION & MANAGEMENT, Health policy < HEALTH SERVICES ADMINISTRATION & MANAGEMENT, Health & safety < HEALTH SERVICES ADMINISTRATION & MANAGEMENT                                                                                                                                                                                                                                                                                                                                                                                                                                                       |
|                               |                                                                                                                                                                                                                                                                                                                                                                                                                                                                                                                                                                                                                                                                                                                                                                      |

SCHOLARONE™  
Manuscripts

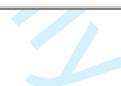

# Applying an analytical framework to map the impact of electronic data sharing on quality of care and safety: protocol for a systematic review

**Authors:** Ana Luisa Neves<sup>1</sup> (ALN) - [ana.luisa.neves14@imperial.ac.uk](mailto:ana.luisa.neves14@imperial.ac.uk), Alexander Carter (AC) - [a.w.carter@imperial.ac.uk](mailto:a.w.carter@imperial.ac.uk), Lisa Freise<sup>1</sup> (LF) - [l.freise16@imperial.ac.uk](mailto:l.freise16@imperial.ac.uk), Liliana Laranjo<sup>2</sup> - [liliana.laranjo@mq.edu.au](mailto:liliana.laranjo@mq.edu.au), Ara Darzi<sup>1</sup> (AD) - [a.darzi@imperial.ac.uk](mailto:a.darzi@imperial.ac.uk), Erik Mayer<sup>1</sup> (EM) - [e.mayer@imperial.ac.uk](mailto:e.mayer@imperial.ac.uk)

<sup>1</sup>Center for Health Policy, Institute of Global Health Innovation, Imperial College London, London, UK

<sup>2</sup>Australian Institute of Health Innovation, Centre for Health Informatics, Macquarie University, Sydney, Australia

## Corresponding author

Name: Ana Luisa Neves

Address: Centre for Health Policy, Room 1035/7, QEQM Wing, St Mary's Campus, London W2 1NY

E-mail: [ana.luisa.neves14@ic.ac.uk](mailto:ana.luisa.neves14@ic.ac.uk)

Telephone: 02033127259

Fax number: 02033126309

**Keywords [MeSH terms]:** Electronic Health Records, Patient Access to Records, Patient-Centered Care, Quality of Health Care, Patient Safety

**Word count:** 2145 words

1  
2  
3 **31 Abstract**  
4  
5  
6 **32**

7  
8 **33** Introduction: Providing patients with access to Electronic health records (EHR) has emerged as a  
9 **34** promising solution to improve quality of care and safety. However, there is a considerable gap between  
10 **35** the predicted and demonstrated benefits of these interventions. As the efforts to develop and implement  
11 **36** EHR-based data sharing platforms mature and scale up worldwide, there is a need to evaluate the impact  
12 **37** of these interventions and to weigh their relative risks and benefits, in order to inform evidence-based  
13 **38** health policies. The aim of this work is to systematically characterise and appraise the demonstrated  
14 **39** benefits of EHR-based data sharing interventions, by mapping them across the six domains of quality of  
15 **40** care of the Institute of Medicine analytical framework (i.e. patient-centredness, effectiveness, efficiency,  
16 **41** timeliness, equity and safety).  
17  
18  
19  
20  
21  
22  
23  
24

25 **43** Methods and analysis: CINAHL, Cochrane, Embase, HMIC, Medline/PubMed and PsycINFO databases  
26 **44** will be searched from January 1997 to August 2017. Primary outcomes will include measures related with  
27 **45** the six domains of quality of care of the IOM analytical framework (i.e. patient-centredness,  
28 **46** effectiveness, efficiency, timeliness, equity and safety). Valid studies will be assessed for their quality  
29 **47** using the Cochrane Risk of Bias Tool by two independent researchers and disagreements will be resolved  
30 **48** by a third person. A narrative synthesis will be conducted for all the included studies. The body of  
31 **49** evidence will be summarised in a Summary of Findings table and the strength of the body of evidence  
32 **50** will be assessed according to the GRADE criteria. Results will be used to develop a comprehensive  
33 **51** framework of the demonstrated benefits of EHR-based data sharing interventions, and subgroup analysis  
34 **52** will be performed by domain of quality of care domain and by time scale (i.e. short-, medium- or long-  
35 **53** term impact). This protocol was registered in PROSPERO (CRD42017070092).  
36  
37  
38  
39  
40  
41  
42  
43

44  
45 **55** Ethics and dissemination: Not applicable.  
46  
47  
48  
49  
50  
51  
52  
53  
54  
55  
56  
57  
58  
59  
60

### 61 **Strengths and limitations of this study**

- 62 • Comprehensive characterisation of EHR-based interventions used to share medical data with patients
- 63 • Summary and appraisal of existing evidence on the potential benefits EHR-based data sharing  
64 interventions, grouped by domain of quality of care and by time scale (*i.e.* short-, medium- or long-  
65 term impact)
- 66 • Development of a framework to customise informed decisions in health policies
- 67 • Expected limitations include the heterogenous nature of the outcomes assessed and the potentially  
68 reduced sample size in subgroup analyses, which may negatively impact the statistical power in data  
69 synthesis.

For peer review only

86

## 87 Introduction

88 Although patients have had the legal right to access their health records since 1998, access to paper-based  
89 health records is mediated by health professionals and data controllers, through a cumbersome procedural  
90 process (1). Additionally, as health information is fragmented between different organisations and levels  
91 of care, data access requests are often unable to provide a comprehensive health history record (2, 3).

92 In the last decade, electronic health records (EHRs), have emerged as a promising solution to enhance  
93 patients' access to centralised medical information (4). The adoption of EHRs by primary care practices,  
94 hospitals and other healthcare organizations has steadily increased in the last years. In England, the  
95 percentage of General Practice surgeries that allowed patients to access their medical records online  
96 increased from 3% to 97% between April 2014 and February 2016 (5). Various EHR-based platforms are  
97 currently used to share health information with patients, including direct online access, with or without  
98 patient-provider communication systems (6, 7) and health maintenance reminders (8, 9). As these efforts  
99 mature and scale up worldwide, there is a need to evaluate the impact of EHR-based data sharing  
100 interventions, in order to weigh their relative risks and benefits and inform evidence-based health policies.

101 The Institute of Medicine (IOM) identified six domains of health care quality: patient-centredness,  
102 effectiveness, efficiency, timeliness, equity and safety (10). Patient-centredness ensures that the care  
103 provided respects and responds to individual patient preferences, needs and values, thus incorporating  
104 them in clinical decisions (10, 11) Health care shall provide evidence-based services, which can be  
105 ultimately expressed as improvements in health outcomes (*i.e.* effectiveness) (12), while ensuring that  
106 potential harms are avoided (*i.e.* patient safety). Other aspects of quality of delivery of care include the  
107 minimisation of the waste of human, physical or economical resources (*i.e.* efficiency), the reduction of  
108 waits and harmful delays (*i.e.* timeliness) and the reduction of avoidable differences on the delivery of  
109 care between different groups of health care users (*i.e.* equity) (10, 13, 14).

110 Providing patients with access to their health records has been linked to theorised benefits in four major  
111 domains of health care quality: patient-centredness, effectiveness, safety and efficiency (15-17).  
112 However, despite the growing body of evidence on the theorised benefits of EHR-data sharing with  
113 patients on these domains, there is still a considerable gap between the predicted and demonstrated  
114 benefits of these interventions (18).

115 In order to analyse the effect of providing patients access to their medical records on quality outcomes,  
116 Davis-Giardina T. et al performed a systematic review including studies published between 1970 and  
117 2012 (19). According to this work, a limited amount of evidence suggests that access to medical records

1  
2  
3 118 improves patient satisfaction and enhances patient-provider communication (19). Similarly, a systematic  
4 119 review from de Lusignan *et al.* reported that providing patients online access to their EHR increased  
5 120 convenience and satisfaction (20).

6  
7  
8 121 Conversely, no clear benefits were found on effectiveness (19). Until 2012, only a few studies evaluated  
9 122 the impact on effectiveness studies, most focussing on type 2 diabetes and with inconsistent results.  
10 123 Tenforde *et al* showed that providing access to medical records was associated with lower glycated  
11 124 haemoglobin A1C values (21); however, no significant effect was found in three other studies assessing  
12 125 diabetes-specific effectiveness measure (22, 23). One of the limitations of this review consists in the  
13 126 inclusion of studies evaluating both EHR and non-EHR based interventions - and this heterogeneity might  
14 127 mask potential EHR-specific potential benefits. Furthermore, as pointed by the authors, the paucity of  
15 128 papers published up to that date resulted in a tendency to include small and methodologically less robust  
16 129 studies, thus increasing the risk of selective reporting and/or publication bias (19). Mold F. *et al* also  
17 130 performed a systematic review assessing the impact of providing patients with access to their EHRs;  
18 131 based in studies published between 1999 and 2012, this work found a positive influence in patient safety  
19 132 (24).

20  
21  
22 133 However, the authors were unable to find a consistent beneficial effect on efficiency measures (*i.e.*  
23 134 number of face-to-face visits and telephone appointments) in both reviews (24) (19). While some studies  
24 135 reported an increase in the number of face-to-face consultations (6,25), others document a decrease (9,26-  
25 136 27). Similarly, inconsistent results were found regarding the impact on telephone consultations: only one  
26 137 study reported a decline in the total number (28), whilst six other studies reported either no change or an  
27 138 increase (7, 25-27, 29, 30). It is important to note, however, that most of the included studies assessing  
28 139 efficiency measures included in this review showed a high risk of bias, mostly related to either unclear or  
29 140 absent blinding methods (24).

30  
31  
32 141 The landmark reviews of Mold F. *et al* (24) and Davis-Giardina T. *et al* (19) provide a comprehensive  
33 142 characterisation of the literature published until 2012, highlighting the paucity and the scientific  
34 143 limitations of the evidence published until that date. Although both were unable to demonstrate clear  
35 144 benefits on efficiency and effectiveness measures, resources continue being allocated to EHR-based data  
36 145 sharing interventions and platforms, renewing the interest on this evidence gap. As consequence of these  
37 146 efforts, it is plausible that studies performed in the last 5 years can provide further clarification for this  
38 147 evidence gap. Furthermore, these reviews do not address other domains of quality of care, as timeliness or  
39 148 equity.

1  
2  
3 149 This review will expand on the above-mentioned work, in order to identify recent methodological and  
4 scientific progress until June 2017. Following the PRISMA-P checklist as guidance (31), we propose a  
5 150 systematic and reproducible strategy to query the literature on the demonstrated benefits of EHR-based  
6 151 data sharing and present the results in a comprehensive framework of health care quality measures.  
7  
8 152

### 10 153 **Research aims**

11  
12 154 The main objectives of this review are: 1) to systematically characterise EHR-based data sharing  
13 155 interventions published between 2000-2017; 2) to assess the demonstrated benefits of these interventions  
14 156 on patient-centredness, effectiveness, safety, efficiency, timeliness and equity, compared to usual care (no  
15 157 intervention). As secondary aim, we will develop a conceptual model integrating the contribution of  
16 158 these interventions in short-, medium- and long-term perspectives (Figure 1).  
17  
18  
19  
20

### 23 160 **Methods and analysis**

#### 25 161 *Search strategy*

26  
27 162 The search strategy will be performed using resources that enhance methodological transparency and  
28 163 improve the reproducibility of the results and evidence synthesis. A search of the literature from the last  
29 164 20 years (January 1997 – August 2017) will be performed on CINAHL, Cochrane, Embase, HMIC,  
30 165 Medline/PubMed and PsycINFO. Search strings (Table 1) will combine free terms and controlled  
31 166 vocabulary, whenever supported. Language restrictions will be applied and articles in English will be  
32 167 included. The reference lists of relevant articles will also be screened to ensure all eligible studies are  
33 168 captured. Authors of protocols potentially meeting inclusion criteria will be contacted to provide further  
34 169 information about the progress of the corresponding trial.  
35  
36  
37  
38  
39  
40

#### 43 171 *Study selection criteria*

44  
45 172 A summary of the participants, interventions, comparators and outcomes (PICO) considered, as well as  
46 173 the type of studies included, is provided in Table 2.

47  
48 174 The systematic review will focus on studies on adult subjects, including both patients and carers (mean  
49 175 age of study sample  $\geq 16$  years). The systematic review does not focus on a particular disease area or  
50 176 health system setting as it intends to comprehensively characterise the scope of EHR-based interventions.  
51  
52  
53  
54  
55  
56  
57  
58  
59  
60



1  
2  
3 177 Studies describing EHR-based data sharing interventions, either isolated or as part of a multicomponent  
4 178 interventions, will be included. "*EHR-based data sharing intervention*" will be defined as a data sharing  
5 179 intervention involving: 1) web-based patient access to EHR; 2) EHR-based health reminders / messaging  
6 180 or 3) online patient-provider communication systems (health information exchange platforms). Studies  
7 181 focusing on health reminders only (not EHR-based) or appointment reminders will not be considered. The  
8 182 comparator will be 'no intervention' (*e.g.* usual care).

9  
10  
11  
12  
13 183 Primary outcomes will include any measure related to a) patient-centredness (*e.g.* patient-reported  
14 184 experience measures (PREMs), b) effectiveness (*e.g.* health outcomes); c) patient safety (*e.g.*  
15 185 identification of medication discrepancies); d) efficiency (*e.g.* economic evaluation measures and proxies;  
16 186 including service costs, number of consultations/admissions, e) timeliness (*e.g.* waiting lists, time-to-  
17 187 treatment) and f) equity (*e.g.* discrepancies in quality measures between different groups of patients).  
18 188 Studies that only report cognitive outcomes (*e.g.* intent), motivational outcomes or other subjective  
19 189 psychological measures will be excluded. The types of study considered in this systematic review will be  
20 190 a) randomised controlled trials; b) cluster randomised trials; c) quasi-experimental studies; d) case-control  
21 191 studies and e) cohort studies. Systematic reviews will also be included to ensure that relevant articles will  
22 192 be captured from their respective reference lists.

23  
24  
25  
26  
27  
28  
29  
30 193

#### 31 32 194 *Screening and data extraction*

33  
34 195 Quantitative studies will be independently assessed by three reviewers and reported using the  
35 196 Preferred Reporting Items for Systematic Reviews and Meta-Analyses (PRISMA-P) flow  
36 197 diagram (31). Initial screening of studies will be based on the information contained in their titles  
37 198 and abstracts and will be conducted by two independent investigators. Full-paper screening will  
38 199 be conducted by the same independent investigators. Cohen's kappa will be used to measure  
39 200 inter-coder agreement in each screening phase. When there are doubts regarding inclusion or  
40 201 exclusion, a third investigator will be involved in the decision. Two independent investigators  
41 202 will extract information from the included studies into a standardized form. The data collected  
42 203 for each study will include: name of the first author, year of publication, technology, intervention  
43 204 components and characteristics, study duration, participants' and setting characteristics,  
44 205 outcomes and retention rates. Two investigators will review the abstraction form for consistency.  
45 206 Disagreements will be resolved by a third investigator.

46  
47  
48  
49  
50  
51  
52  
53  
54  
55  
56 207  
57  
58  
59  
60

1  
2  
3 208 *Quality assessment*  
4

5 209 Valid studies will then be assessed for their quality using the Cochrane Risk of Bias Tool (32), that  
6 210 assesses the following study-level aspects: a) randomisation sequence allocation; b) allocation  
7 211 concealment; c) blinding; d) completeness of outcome data and e) selective outcome reporting. Two  
8 212 independent reviewers will score the selected studies and disagreements will be resolved by a third  
9 213 person.  
10  
11  
12  
13

14 214

15  
16 215 *Descriptive analysis and meta-analysis*  
17

18 216 A narrative synthesis will be conducted for all the included studies. Parallel-group trials that are deemed  
19 217 comparable in relevant ways will be pooled together for a summary effect. Whenever possible,  
20 218 continuous and dichotomous outcomes will be pooled together for meta-analysis purposes. All effect sizes  
21 219 will be transformed into a common metric, in order to make them comparable across studies — the bias-  
22 220 corrected standardized difference in means (Hedges'  $g$ ) — classified as positive when in favor of the  
23 221 intervention and negative when in favor of the control. Heterogeneity will be assessed using  $I^2$ . The  
24 222 presence of publication bias will be evaluated by use of a funnel plot and the Duval and Tweedie's trim  
25 223 and fill method (33).  
26  
27  
28  
29  
30

31 224 We will also explore the cause of any observed statistical heterogeneity using subgroup analysis. Planned  
32 225 subgroup analysis will be performed by domain of quality of care, time scale (*i.e.* short-, medium- or  
33 226 long-term impact) and risk of bias (low *versus* high, as assessed by the Cochrane Risk of Bias Tool) (32).  
34 227 Depending on the amount of information retrieved, subgroup analysis will also be performed for specific  
35 228 diseases. The body of evidence will be summarised in a Summary of Findings table and the strength of  
36 229 the body of evidence will be assessed according to GRADE criteria (34).  
37  
38  
39  
40  
41

42 230

43  
44 231 *Amendments*  
45

46 232 Any amendments to this protocol will be documented with reference to saved searches and analysis  
47 233 methods, which will be recorded in bibliographic databases (Ovid), Endnote, and Excel templates for data  
48 234 collection and synthesis.  
49  
50  
51  
52  
53  
54  
55  
56  
57  
58  
59  
60

235

**236 Discussion**

237 As the implementation of EHR-based data sharing interventions scales up worldwide, the systematic  
238 evaluation of the impact of such interventions emerges as a priority research topic.

239 One of the strengths of the proposed study is to apply a reproducible and transparent procedure for  
240 systematic review of the literature. In this protocol, we clearly describe the types of studies, participants,  
241 interventions, and outcomes that will be included, as well as the data sources, search strategy, data  
242 extraction methods (including quality assessment) and methods of combining data (35). By publishing the  
243 research protocol, we reinforce the clarity of the strategy and minimise the risk of bias, namely selective  
244 outcome reporting (32). Second, we will focus solely on the impact of EHR-based studies, increasing the  
245 sensitivity to detect specific benefits of this type of intervention. Third, for the first time, we aim to  
246 comprehensively evaluate the benefits of these interventions in a wide range of domains of quality of  
247 care, as defined by the IOM. This framework shall provide high-level information to inform, support and  
248 customise decisions in health policies.

249

250 Potential limitations of this study include the heterogeneity of measures and outcomes evaluated and the  
251 potentially reduced number of studies in subgroup analyses, which may negatively influence the statistical  
252 power in data synthesis.

253

254

255

256

257

258

259

260

261

262

263

264

1  
2  
3 2654  
5 266 **Acknowledgements**6  
7 267 We thank Jacqueline Cousins (information specialist at Imperial College London) for the support  
8  
9 268 improving the composition of the search terms and procedural aspects of the search strategy.10  
11 26912  
13 270 **Ethics and dissemination**14  
15 271 Not applicable.16  
17 27218  
19  
20 273 **Authors' contributions**21  
22 274 ALN, AC and EKM conceptualised this research. ALN, AC and LL designed the protocol. ALN and LF  
23  
24 275 defined the concepts and search items. EKM and AD contributed to the conceptualisation and commented  
25  
26 276 on the multiple versions of the protocol. The manuscript was written by ALN with contributions from all  
27  
28 277 authors.29  
30 27831  
32 279 **Funding statement**33  
34 280 This work is supported by the Sowerby Program and by the National Institute for Health  
35  
36 281 Research (NIHR) Patient Safety Translation Research Centre. The views of the authors do not  
37  
38 282 necessarily reflect those of the NHS, NIHR or the Department of Health.39  
40 28341  
42 284 **Competing interests' statement**43  
44 285 We declare no conflict(s) of interest associated with this research.45  
46 28647  
48 287 **Data sharing statement**49  
50  
51 288 No additional data relevant to this protocol are available for distribution. All relevant data and search  
52  
53 289 terms are published in this manuscript.

54

55

56

57

58

59

60

290

291

292 **Table 1. Concepts and search items**

| Database                                                                                                                                                                | Search items                                                                                                                                                                                                                                                                                                                                                                                                                                                                                                                                                                                                                                                                                                                                                                                                                                                                                                                                                                                                                                                                              |
|-------------------------------------------------------------------------------------------------------------------------------------------------------------------------|-------------------------------------------------------------------------------------------------------------------------------------------------------------------------------------------------------------------------------------------------------------------------------------------------------------------------------------------------------------------------------------------------------------------------------------------------------------------------------------------------------------------------------------------------------------------------------------------------------------------------------------------------------------------------------------------------------------------------------------------------------------------------------------------------------------------------------------------------------------------------------------------------------------------------------------------------------------------------------------------------------------------------------------------------------------------------------------------|
| <b>CINAHL via EBSCO</b>                                                                                                                                                 | <ol style="list-style-type: none"> <li>1. (((electronic* or online or on-line or digital*) N1 (health record* or medical record* or personal record* or patient record*)) or EHR# or EMR# or ephr#)</li> <li>2. ((information or data) N4 (shar* or exchange*)) or HIE or HIEs or access*)</li> <li>3. #1 and #2</li> <li>4. (((experience or satisfaction) N4 (patient* or consumer* or client* or survey or questionnaire*)) or PREM* or patient-reported experience measure*)</li> <li>5. (effectiveness or health outcome*)</li> <li>6. (patient N1 (safety or harm)) or safety manag* or accident prevent* or error* or medication reconcil* or near miss*</li> <li>7. (efficiency or economic* or cost* or expenditure* or charge* or fee*1 or (number N1 appointment*) or (number adj2 admission*) or (number N1 telephone visit*))</li> <li>8. waiting lists or timeliness or time-to-treatment</li> <li>9. health equity</li> <li>10. #4 or #5 or #6 or #7 or #8 or #9</li> <li>13. 3 and 10</li> </ol>                                                                          |
| <b>Cochrane via url:</b><br><a href="http://onlinelibrary.wiley.com/cochranelibrary/search/advanced">http://onlinelibrary.wiley.com/cochranelibrary/search/advanced</a> | <ol style="list-style-type: none"> <li>1. (((electronic* or online or on-line or digital*) near/1 (health record* or medical record* or personal record* or patient record*)) or EHR or EHRs or EMR or EMRs or ephr or ephrs)</li> <li>2. Electronic Health Records [MesH]</li> <li>3. #1 or #2</li> <li>4. (((information or data) near/4 (shar* or exchange*)) or HIE or HIES or access*)</li> <li>5. Information Dissemination [MesH]</li> <li>6. #4 or #5</li> <li>7. #3 and #6</li> <li>8. (((experience or satisfaction) near/4 (patient* or consumer* or client* or survey or questionnaire*)) or PREM* or patient-reported experience measure*)</li> <li>9. (effectiveness or health outcome*)</li> <li>10. (patient near/1 safety) or (patient near/1 harm) or safety manag* or accident prevent* or error* or medication reconcil*</li> <li>11. (efficiency or economic* or cost* or expenditure* or charge* or fee* or (number near/1 appointment*) or (number near/1 admission*) or (number near/1 telephone visit*))</li> <li>12. time-to-treatment or timeliness</li> </ol> |

|                        |                                                                                                                                                                                                                                                                                                                                                                                                                                                                                                                                                                                                                                                                                                                                                                                                                                                                                                                                                                                                                                  |
|------------------------|----------------------------------------------------------------------------------------------------------------------------------------------------------------------------------------------------------------------------------------------------------------------------------------------------------------------------------------------------------------------------------------------------------------------------------------------------------------------------------------------------------------------------------------------------------------------------------------------------------------------------------------------------------------------------------------------------------------------------------------------------------------------------------------------------------------------------------------------------------------------------------------------------------------------------------------------------------------------------------------------------------------------------------|
|                        | <p>13. waiting lists [MesH]<br/> 14. health equity [MesH]<br/> 15. #8 or #9 or #10 or #11 or #12 or #13 or #14<br/> 17. 7 and 15</p>                                                                                                                                                                                                                                                                                                                                                                                                                                                                                                                                                                                                                                                                                                                                                                                                                                                                                             |
| <b>Embase via Ovid</b> | <p>1. (((electronic* or online or on-line or digital*) adj2 (health record* or medical record* or personal record* or patient record*)) or EHR? or EMR? or ephr?)<br/> 2. Electronic health record/<br/> 3. 1 or 2<br/> 4. (((information or data) adj5 (shar* or exchang*)) or HIE*2 or access*)<br/> 5. Information dissemination/<br/> 6. 4 or 5<br/> 7. 3 and 6<br/> 8. (((experience or satisfaction) adj5 (patient* or consumer* or client* or survey or questionnaire*)) or PREM* or patient-reported experience measure*)<br/> 9. (effectiveness or health outcome*) 10. (patient adj2 (safety or harm)) or safety manag* or accident prevent* or error* or medication reconcil* or near miss*<br/> 11. (efficiency or economic* or cost* or expenditure* or charge* or fee*1 or (number adj2 appointment*) or (number adj2 admission*) or (number adj2 telephone visit*))<br/> 12. waiting list* or time to treatment/ or timeliness<br/> 13. health equity/<br/> 14. 8 or 9 or 10 11 or 12 or 13<br/> 15. 7 and 14</p> |
| <b>HMIC via Ovid</b>   | <p>1. (((electronic* or online or on-line or digital*) adj2 (health record* or medical record* or personal record* or patient record*)) or EHR? or EMR? or ephr?)<br/> 2. Electronic patient records/<br/> 3. 1 or 2<br/> 4. (((information or data) adj5 (shar* or exchang*)) or HIE*2 or access*)<br/> 5. Information exchange/<br/> 6. 4 or 5<br/> 7. 3 and 6<br/> 8. (((experience or satisfaction) adj5 (patient* or consumer* or client* or survey or questionnaire*)) or PREM* or patient-reported experience measure*)<br/> 9. (effectiveness or health outcome*) 10. (patient adj2 (safety or harm)) or safety manag* or accident prevent* or error* or medication reconcil* or near miss*<br/> 11. (efficiency or economic* or cost* or expenditure* or charge* or fee*1 or (number adj2 appointment*) or (number adj2 admission*) or</p>                                                                                                                                                                              |

|                          |                                                                                                                                                                                                                                                                                                                                                                                                                                                                                                                                                                                                                                                                                                                                                                                                                                                                                                                                                                                                                                                                    |
|--------------------------|--------------------------------------------------------------------------------------------------------------------------------------------------------------------------------------------------------------------------------------------------------------------------------------------------------------------------------------------------------------------------------------------------------------------------------------------------------------------------------------------------------------------------------------------------------------------------------------------------------------------------------------------------------------------------------------------------------------------------------------------------------------------------------------------------------------------------------------------------------------------------------------------------------------------------------------------------------------------------------------------------------------------------------------------------------------------|
|                          | <p>(number adj2 telephone visit*))</p> <p>12. waiting lists/ or patient waiting time or timeliness</p> <p>13. health inequalities/ or equity</p> <p>14. 8 or 9 or 10 or 11 or 12 or 13</p> <p>15. 7 and 14</p>                                                                                                                                                                                                                                                                                                                                                                                                                                                                                                                                                                                                                                                                                                                                                                                                                                                     |
| <b>Medline via Ovid</b>  | <p>1. (((electronic* or online or on-line or digital*) adj2 (health record* or medical record* or personal record* or patient record*)) or EHR? or EMR? or ephr?)</p> <p>2. Electronic Health Records/</p> <p>3. 1 or 2</p> <p>4. (((information or data) adj5 (shar* or exchange*)) or HIE*2 or access*)</p> <p>5. Information Dissemination/</p> <p>6. 4 or 5</p> <p>7. 3 and 6</p> <p>8. (((experience or satisfaction) adj5 (patient* or consumer* or client* or survey or questionnaire*)) or PREM* or patient-reported experience measure*)</p> <p>9. (effectiveness or health outcome*)</p> <p>10. ((patient adj2 (safety or harm)) or safety manag* or accident prevent* or error* or medication reconcil* or near miss*)</p> <p>11. (efficiency or economic* or cost* or expenditure* or charge* or fee*1 or (number adj2 appointment*) or (number adj2 admission*) or (number adj2 telephone visit*))</p> <p>12. Waiting Lists/ or Time-to-treatment/ or timeliness</p> <p>13. Health Equity/</p> <p>14. 8 or 9 or 10 or 11 or 12 or 13 15. 7 and 14</p> |
| <b>PsycINFO via Ovid</b> | <p>1. (((electronic* or online or on-line or digital*) adj2 (health record* or medical record* or personal record* or patient record*)) or EHR? or EMR? or ephr?)</p> <p>2. (((information or data) adj5 (shar* or exchange*)) or HIE*2 or access*)</p> <p>3. 1 and 2</p> <p>4. (((experience or satisfaction) adj5 (patient* or consumer* or client* or survey or questionnaire*)) or PREM* or patient-reported experience measure*)</p> <p>5. (effectiveness or health outcome*)</p> <p>6. (patient adj2 (safety or harm)) or safety manag* or accident prevent* or error* or medication reconcil* or near miss*</p> <p>7. (efficiency or economic* or cost* or expenditure* or charge* or fee*1 or (number adj2 appointment*) or (number adj2 admission*) or (number adj2 telephone visit*))</p> <p>8. waiting list* or time-to-treatment or timeliness</p> <p>9. equity or health disparities/</p> <p>10. 4 or 5 or 6 or 7 or 8 or 9</p> <p>11. 3 and 10</p>                                                                                                   |

1  
2  
3 293 Search themes (facets) and terms derived for each theme relating to the use of EHR and predicted benefits  
4 294 (patient experience, effectiveness and efficiency)  
5  
6  
7  
8  
9  
10  
11  
12  
13  
14  
15  
16  
17  
18  
19  
20  
21  
22  
23  
24  
25  
26  
27  
28  
29  
30  
31  
32  
33  
34  
35  
36  
37  
38  
39  
40  
41  
42  
43  
44  
45  
46  
47  
48  
49  
50  
51  
52  
53  
54  
55  
56  
57  
58  
59  
60

For peer review only



295

| <b>Table 2. Inclusion and exclusion criteria</b> |                                                                                                                                                                                                                                                                                                                                                                                                                                                        |                                                                                                                                   |
|--------------------------------------------------|--------------------------------------------------------------------------------------------------------------------------------------------------------------------------------------------------------------------------------------------------------------------------------------------------------------------------------------------------------------------------------------------------------------------------------------------------------|-----------------------------------------------------------------------------------------------------------------------------------|
|                                                  | <b>Inclusion criteria</b>                                                                                                                                                                                                                                                                                                                                                                                                                              | <b>Exclusion criteria</b>                                                                                                         |
| <b>Population</b>                                | Adult subjects (patients and carers)                                                                                                                                                                                                                                                                                                                                                                                                                   | Individuals 16 years of age and under (e.g. mean age of study sample <16)                                                         |
| <b>Intervention</b>                              | Electronic health record-based interventions, including: <ul style="list-style-type: none"> <li>• Patient access to EHR</li> <li>• EHR-based reminders / messaging</li> <li>• Unidirectional or bidirectional online patient-provider communication systems (care information exchange platforms);</li> </ul>                                                                                                                                          | <ul style="list-style-type: none"> <li>• Health reminders only</li> </ul>                                                         |
| <b>Comparison</b>                                | No intervention (e.g. usual care)                                                                                                                                                                                                                                                                                                                                                                                                                      |                                                                                                                                   |
| <b>Outcome</b>                                   | Any measure related to a) patient-centredness (e.g. PREMs), b) effectiveness (e.g. health outcomes); c) patient safety (e.g. identification of medication discrepancies); d) efficiency (e.g. economic evaluation measures and proxies; including service costs, number of consultations/admissions, e) timeliness (e.g. waiting lists, time-to-treatment) or f) equity (e.g. discrepancies in quality measures between different groups of patients). | Studies that only report cognitive outcomes (e.g. intention to), motivational outcomes or other subjective psychological measures |
| <b>Study type</b>                                | Randomised controlled trials, cluster randomised trials, quasi-experimental, case-control, cohort studies, systematic reviews                                                                                                                                                                                                                                                                                                                          |                                                                                                                                   |

296

297

298 **Reference**

- 299 1. Dimond B. Rights to information access under the Data Protection Act. *Br J Nurs*.  
300 2005;14(14):774-6.
- 301 2. Stange KC. The problem of fragmentation and the need for integrative solutions. *Ann Fam Med*.  
302 2009;7(2):100-3.
- 303 3. Roukema J, Los RK, Bleeker SE, van Ginneken AM, van der Lei J, Moll HA. Paper versus computer:  
304 feasibility of an electronic medical record in general pediatrics. *Pediatrics*. 2006;117(1):15-21.
- 305 4. Vest JR. Health information exchange: national and international approaches. *Adv Health Care*  
306 *Manag*. 2012;12:3-24.
- 307 5. House of Parliament. EHR House of Parliament Report. 2016.
- 308 6. Delbanco T, Walker J, Bell SK, Darer JD, Elmore JG, Farag N, et al. Inviting patients to read their  
309 doctors' notes: a quasi-experimental study and a look ahead. *Ann Intern Med*. 2012;157(7):461-70.
- 310 7. Katz SJ, Nissan N, Moyer CA. Crossing the digital divide: evaluating online communication  
311 between patients and their providers. *Am J Manag Care*. 2004;10(9):593-8.
- 312 8. Wright A, Poon EG, Wald J, Feblowitz J, Pang JE, Schnipper JL, et al. Randomized controlled trial  
313 of health maintenance reminders provided directly to patients through an electronic PHR. *J Gen Intern*  
314 *Med*. 2012;27(1):85-92.
- 315 9. Nagykaldi Z, Aspy CB, Chou A, Mold JW. Impact of a Wellness Portal on the delivery of patient-  
316 centered preventive care. *J Am Board Fam Med*. 2012;25(2):158-67.
- 317 10. Institute of Medicine Committee on Quality of Health Care in America. *Crossing the Quality*  
318 *Chasm: A New Health System for the 21st Century*. National Academies Press; 2001.
- 319 11. Scholl I, Zill JM, Harter M, Dirmaier J. An integrative model of patient-centeredness - a  
320 systematic review and concept analysis. *PLoS One*. 2014;9(9):e107828.
- 321 12. Arah OA, Klazinga NS, Delnoij DMJ, ten Asbroek AHA, Custers T. Conceptual frameworks for  
322 health systems performance: a quest for effectiveness, quality, and improvement. *Int J Qual Health*  
323 *Care*. 2003;15(5):377-98.
- 324 13. Hussey PS, de Vries H, Romley J, Wang MC, Chen SS, Shekelle PG, et al. A systematic review of  
325 health care efficiency measures. *Health Serv Res*. 2009;44(3):784-805.
- 326 14. World Health Organisation. *Health Systems: Equity*. World Health Organisation; 2017.
- 327 15. Wagner KA, Lee FW, Glaser JP. *Healthcare information systems: A practical approach for health*  
328 *care management*. John Wiley & Sons 2013.
- 329 16. Department of Health. *The power of information: giving people control of the health and care*  
330 *information they need*. Department of Health; 2012.
- 331 17. Ross SE, Lin C-T. The effects of promoting patient access to medical records: a review. *J Am Med*  
332 *Inform Assoc*. 2003;10(2):129-38.
- 333 18. Jilka SR, Callahan R, Sevdalis N, Mayer EK, Darzi A. "Nothing About Me Without Me": An  
334 Interpretative Review of Patient Accessible Electronic Health Records. *J Med Internet Res*.  
335 2015;17(6):e161.
- 336 19. Davis Giardina T, Menon S, Parrish DE, Sittig DF, Singh H. Patient access to medical records and  
337 healthcare outcomes: a systematic review. *J Am Med Inform Assoc*. 2014;21(4):737-41.
- 338 20. de Lusignan S, Mold F, Sheikh A, Majeed A, Wyatt JC, Quinn T, et al. Patients' online access to  
339 their electronic health records and linked online services: a systematic interpretative review. *BMJ Open*.  
340 2014;4(9):e006021.
- 341 21. Tenforde M, Nowacki A, Jain A, Hickner J. The association between personal health record use  
342 and diabetes quality measures. *J Gen Intern Med*. 2012;27(4):420-4.

- 1  
2  
3 343 22. McCarrier KP, Ralston JD, Hirsch IB, Lewis G, Martin DP, Zimmerman FJ, et al. Web-based  
4 344 collaborative care for type 1 diabetes: a pilot randomized trial. *Diabetes Technol Ther*. 2009;11(4):211-7.  
5 345 23. Grant RW, Wald JS, Schnipper JL, Gandhi TK, Poon EG, Orav EJ, et al. Practice-linked online  
6 346 personal health records for type 2 diabetes mellitus: a randomized controlled trial. *Arch Intern Med*.  
7 347 2008;168(16):1776-82.  
8 348 24. Mold F, de Lusignan S, Sheikh A, Majeed A, Wyatt JC, Quinn T, et al. Patients' online access to  
9 349 their electronic health records and linked online services: a systematic review in primary care. *Br J Gen*  
10 350 *Pract*. 2015;65(632):e141-51.  
11 351 25. Palen TE, Ross C, Powers JD, Xu S. Association of online patient access to clinicians and medical  
12 352 records with use of clinical services. *JAMA*. 2012;308(19):2012-9.  
13 353 26. Bergmo TS, Kummervold PE, Gammon D, Dahl LB. Electronic patient-provider communication:  
14 354 will it offset office visits and telephone consultations in primary care? *Int J Med Inform*. 2005;74(9):705-  
15 355 10.  
16 356 27. Zhou YY, Garrido T, Chin HL, Wiesenthal AM, Liang LL. Patient access to an electronic health  
17 357 record with secure messaging: impact on primary care utilization. *Am J Manag Care*. 2007;13(7):418-24.  
18 358 28. Kummervold PE, Trondsen M, Andreassen H, Gammon D, Hjortdahl P. [Patient-physician  
19 359 interaction over the internet]. *Erfaringer med lege-pasient-kontakt over Internett*. *Tidsskr Nor*  
20 360 *Laegeforen*. 2004;124(20):2633-6.  
21 361 29. Lin C-T, Wittevrongel L, Moore L, Beaty BL, Ross SE. An Internet-based patient-provider  
22 362 communication system: randomized controlled trial. *J Med Internet Res*. 2005;7(4):e47.  
23 363 30. Katz SJ, Moyer CA, Cox DT, Stern DT. Effect of a triage-based E-mail system on clinic resource use  
24 364 and patient and physician satisfaction in primary care: a randomized controlled trial. *J Gen Intern Med*.  
25 365 2003;18(9):736-44.  
26 366 31. Moher D, Shamseer L, Clarke M, Ghersi D, Liberati A, Petticrew M, et al. Preferred reporting  
27 367 items for systematic review and meta-analysis protocols (PRISMA-P) 2015 statement. *Syst Rev*. 2015;4:1.  
28 368 32. Higgins J, Green S. *Cochrane Handbook for Systematic Reviews of Interventions*. John Wiley &  
29 369 Sons; 2008.  
30 370 33. Duval S, Tweedie R. Trim and fill: A simple funnel-plot-based method of testing and adjusting for  
31 371 publication bias in meta-analysis. *Biometrics*. 2000;56(2):455-63.  
32 372 34. Guyatt GH, Oxman AD, Vist GE, Kunz R, Falck-Ytter Y, Alonso-Coello P, et al. GRADE: an emerging  
33 373 consensus on rating quality of evidence and strength of recommendations. *Bmj*. 2008;336(7650):924-6.  
34 374 35. Silagy CA, Middleton P, Hopewell S. Publishing protocols of systematic reviews: comparing what  
35 375 was done to what was planned. *JAMA* 2002;287(21):2831-4.

376

1  
2  
3  
4  
5  
6  
7  
8  
9  
10  
11  
12  
13  
14  
15  
16  
17  
18  
19  
20  
21  
22  
23  
24  
25  
26  
27  
28  
29  
30  
31  
32  
33  
34  
35  
36  
37  
38  
39  
40  
41  
42  
43  
44  
45  
46  
47  
48  
49  
50  
51  
52  
53  
54  
55  
56  
57  
58  
59  
60

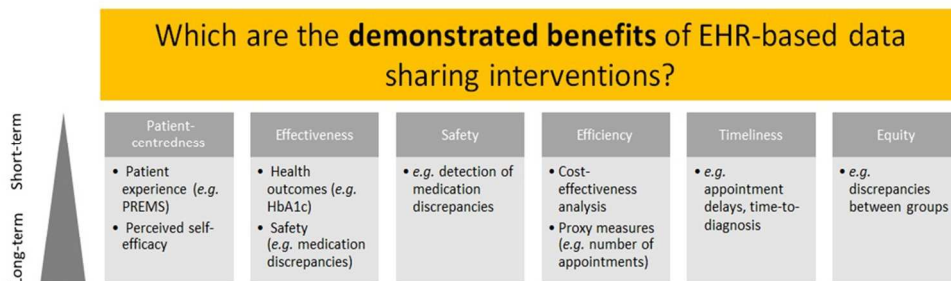

Figure 1. Conceptual model

338x190mm (96 x 96 DPI)

Review only

1  
2  
3  
4  
5  
6  
7  
8  
9  
10  
11  
12  
13  
14  
15  
16  
17  
18  
19  
20  
21  
22  
23  
24  
25  
26  
27  
28  
29  
30  
31  
32  
33  
34  
35  
36  
37  
38  
39  
40  
41  
42  
43  
44  
45  
46  
47

**PRISMA-P (Preferred Reporting Items for Systematic review and Meta-Analysis Protocols) 2015 checklist: recommended items to address in a systematic review protocol\***

| Section and topic                 | Item No | Checklist item                                                                                                                                                                                                                | Page           |
|-----------------------------------|---------|-------------------------------------------------------------------------------------------------------------------------------------------------------------------------------------------------------------------------------|----------------|
| <b>ADMINISTRATIVE INFORMATION</b> |         |                                                                                                                                                                                                                               |                |
| Title:                            |         |                                                                                                                                                                                                                               |                |
| Identification                    | 1a      | Identify the report as a protocol of a systematic review                                                                                                                                                                      | 1, 2, 8, 9, 10 |
| Update                            | 1b      | If the protocol is for an update of a previous systematic review, identify as such                                                                                                                                            | Not applicable |
| Registration                      | 2       | If registered, provide the name of the registry (such as PROSPERO) and registration number                                                                                                                                    | 2              |
| Authors:                          |         |                                                                                                                                                                                                                               |                |
| Contact                           | 3a      | Provide name, institutional affiliation, e-mail address of all protocol authors; provide physical mailing address of corresponding author                                                                                     | 1              |
| Contributions                     | 3b      | Describe contributions of protocol authors and identify the guarantor of the review                                                                                                                                           | 10             |
| Amendments                        | 4       | If the protocol represents an amendment of a previously completed or published protocol, identify as such and list changes; otherwise, state plan for documenting important protocol amendments                               | Not applicable |
| Support:                          |         |                                                                                                                                                                                                                               |                |
| Sources                           | 5a      | Indicate sources of financial or other support for the review                                                                                                                                                                 | 10             |
| Sponsor                           | 5b      | Provide name for the review funder and/or sponsor                                                                                                                                                                             | 10             |
| Role of sponsor or funder         | 5c      | Describe roles of funder(s), sponsor(s), and/or institution(s), if any, in developing the protocol                                                                                                                            | 10             |
| <b>INTRODUCTION</b>               |         |                                                                                                                                                                                                                               |                |
| Rationale                         | 6       | Describe the rationale for the review in the context of what is already known                                                                                                                                                 | 3              |
| Objectives                        | 7       | Provide an explicit statement of the question(s) the review will address with reference to participants, interventions, comparators, and outcomes (PICO)                                                                      | 6              |
| <b>METHODS</b>                    |         |                                                                                                                                                                                                                               |                |
| Eligibility criteria              | 8       | Specify the study characteristics (such as PICO, study design, setting, time frame) and report characteristics (such as years considered, language, publication status) to be used as criteria for eligibility for the review | 6,14           |
| Information sources               | 9       | Describe all intended information sources (such as electronic databases, contact with study authors, trial registers or other grey literature sources) with planned dates of coverage                                         | 6              |
| Search strategy                   | 10      | Present draft of search strategy to be used for at least one electronic database, including planned limits, such that it could be repeated                                                                                    | 6, 12-16       |

|                                    |     |                                                                                                                                                                                                                                                  |   |
|------------------------------------|-----|--------------------------------------------------------------------------------------------------------------------------------------------------------------------------------------------------------------------------------------------------|---|
| Study records:                     |     |                                                                                                                                                                                                                                                  |   |
| Data management                    | 11a | Describe the mechanism(s) that will be used to manage records and data throughout the review                                                                                                                                                     | 7 |
| Selection process                  | 11b | State the process that will be used for selecting studies (such as two independent reviewers) through each phase of the review (that is, screening, eligibility and inclusion in meta-analysis)                                                  | 7 |
| Data collection process            | 11c | Describe planned method of extracting data from reports (such as piloting forms, done independently, in duplicate), any processes for obtaining and confirming data from investigators                                                           | 7 |
| Data items                         | 12  | List and define all variables for which data will be sought (such as PICO items, funding sources), any pre-planned data assumptions and simplifications                                                                                          | 7 |
| Outcomes and prioritization        | 13  | List and define all outcomes for which data will be sought, including prioritization of main and additional outcomes, with rationale                                                                                                             | 6 |
| Risk of bias in individual studies | 14  | Describe anticipated methods for assessing risk of bias of individual studies, including whether this will be done at the outcome or study level, or both; state how this information will be used in data synthesis                             | 6 |
| Data synthesis                     | 15a | Describe criteria under which study data will be quantitatively synthesised                                                                                                                                                                      | 6 |
|                                    | 15b | If data are appropriate for quantitative synthesis, describe planned summary measures, methods of handling data and methods of combining data from studies, including any planned exploration of consistency (such as $I^2$ , Kendall's $\tau$ ) | 7 |
|                                    | 15c | Describe any proposed additional analyses (such as sensitivity or subgroup analyses, meta-regression)                                                                                                                                            | 7 |
|                                    | 15d | If quantitative synthesis is not appropriate, describe the type of summary planned                                                                                                                                                               | 7 |
| Meta-bias(es)                      | 16  | Specify any planned assessment of meta-bias(es) (such as publication bias across studies, selective reporting within studies)                                                                                                                    | 7 |
| Confidence in cumulative evidence  | 17  | Describe how the strength of the body of evidence will be assessed (such as GRADE)                                                                                                                                                               | 7 |

**\* It is strongly recommended that this checklist be read in conjunction with the PRISMA-P Explanation and Elaboration (cite when available) for important clarification on the items. Amendments to a review protocol should be tracked and dated. The copyright for PRISMA-P (including checklist) is held by the PRISMA-P Group and is distributed under a Creative Commons Attribution Licence 4.0.**

*From: Shamseer L, Moher D, Clarke M, Ghersi D, Liberati A, Petticrew M, Shekelle P, Stewart L, PRISMA-P Group. Preferred reporting items for systematic review and meta-analysis protocols (PRISMA-P) 2015: elaboration and explanation. BMJ. 2015 Jan 2;349(jan02 1):g7647.*

# BMJ Open

## Impact of sharing electronic health records with patients on the quality and safety of care: a systematic review and narrative synthesis protocol

|                                 |                                                                                                                                                                                                                                                                                                                                                                                                                                                                                                                                                                                                                                                                                                                                                                      |
|---------------------------------|----------------------------------------------------------------------------------------------------------------------------------------------------------------------------------------------------------------------------------------------------------------------------------------------------------------------------------------------------------------------------------------------------------------------------------------------------------------------------------------------------------------------------------------------------------------------------------------------------------------------------------------------------------------------------------------------------------------------------------------------------------------------|
| Journal:                        | <i>BMJ Open</i>                                                                                                                                                                                                                                                                                                                                                                                                                                                                                                                                                                                                                                                                                                                                                      |
| Manuscript ID                   | bmjopen-2017-020387.R1                                                                                                                                                                                                                                                                                                                                                                                                                                                                                                                                                                                                                                                                                                                                               |
| Article Type:                   | Protocol                                                                                                                                                                                                                                                                                                                                                                                                                                                                                                                                                                                                                                                                                                                                                             |
| Date Submitted by the Author:   | 26-Mar-2018                                                                                                                                                                                                                                                                                                                                                                                                                                                                                                                                                                                                                                                                                                                                                          |
| Complete List of Authors:       | Neves, Ana Luisa; Imperial College London, Center for Health Policy, Institute of Global Health Innovation<br>Carter, Alexander; Imperial College London, Center for Health Policy, Institute of Global Health Innovation<br>Freise, Lisa; Imperial College London, Center for Health Policy, Institute of Global Health Innovation<br>Laranjo, Liliana; Macquarie University Faculty of Science, Australian Institute of Health Innovation; Universidade Nova de Lisboa, Centro de Investigação em Saúde Pública, Escola Nacional de Saúde Pública<br>Darzi, Ara; Imperial College London, Center for Health Policy, Institute of Global Health Innovation<br>Mayer, Erik; Imperial College London, Center for Health Policy, Institute of Global Health Innovation |
| <b>Primary Subject Heading</b>: | Health informatics                                                                                                                                                                                                                                                                                                                                                                                                                                                                                                                                                                                                                                                                                                                                                   |
| Secondary Subject Heading:      | Evidence based practice, Health policy                                                                                                                                                                                                                                                                                                                                                                                                                                                                                                                                                                                                                                                                                                                               |
| Keywords:                       | Health informatics < BIOTECHNOLOGY & BIOINFORMATICS, Information technology < BIOTECHNOLOGY & BIOINFORMATICS, Quality in health care < HEALTH SERVICES ADMINISTRATION & MANAGEMENT, Health policy < HEALTH SERVICES ADMINISTRATION & MANAGEMENT, Health & safety < HEALTH SERVICES ADMINISTRATION & MANAGEMENT                                                                                                                                                                                                                                                                                                                                                                                                                                                       |
|                                 |                                                                                                                                                                                                                                                                                                                                                                                                                                                                                                                                                                                                                                                                                                                                                                      |

SCHOLARONE™  
Manuscripts

1  
2  
3  
4 1 **Impact of sharing electronic health records with patients**  
5 2 **on the quality and safety of care:**  
6  
7 3 **a systematic review and narrative synthesis protocol**  
8  
9 4

10 5 **Authors:** Ana Luisa Neves<sup>1</sup> (ALN) - [ana.luisa.neves14@imperial.ac.uk](mailto:ana.luisa.neves14@imperial.ac.uk), Alexander Carter (AC)  
11 6 - [a.w.carter@imperial.ac.uk](mailto:a.w.carter@imperial.ac.uk), Lisa Freise<sup>1</sup> (LF) - [l.freise16@imperial.ac.uk](mailto:l.freise16@imperial.ac.uk), Liliana Laranjo<sup>2</sup> -  
12 7 [liliana.laranjo@mq.edu.au](mailto:liliana.laranjo@mq.edu.au), Ara Darzi<sup>1</sup> (AD) - [a.darzi@imperial.ac.uk](mailto:a.darzi@imperial.ac.uk), Erik Mayer<sup>1</sup> (EM) -  
13 8 [e.mayer@imperial.ac.uk](mailto:e.mayer@imperial.ac.uk)

14  
15  
16 9 <sup>1</sup>Center for Health Policy, Institute of Global Health Innovation, Imperial College London, London, UK  
17 10 <sup>2</sup>Australian Institute of Health Innovation, Centre for Health Informatics, Macquarie University, Sydney,  
18 11 Australia  
19  
20  
21  
22  
23  
24  
25  
26  
27  
28  
29  
30  
31  
32  
33  
34  
35  
36  
37  
38  
39

40 21 **Corresponding author**

41 22 Name: Ana Luisa Neves

42  
43 23 Address: Centre for Health Policy, Room 1035/7, QEQM Wing, St Mary's Campus, London W2 1NY

44  
45 24 E-mail: [ana.luisa.neves14@ic.ac.uk](mailto:ana.luisa.neves14@ic.ac.uk)

46  
47 25 Telephone: 02033127259

48  
49 26 Fax number: 02033126309  
50  
51

52 28 **Keywords [MeSH terms]:** Electronic Health Records, Patient Access to Records, Patient-Centered Care,  
53 29 Quality of Health Care, Patient Safety  
54

55 30 **Word count:** 2145 words  
56  
57  
58  
59  
60



1  
2  
3 **31 Abstract**  
4  
5  
6 **32**

7  
8 **33** Introduction: Providing patients with access to Electronic Health Records (EHR) has emerged as a  
9 **34** promising solution to improve quality of care and safety. However, there is a considerable gap between  
10 **35** the predicted and demonstrated impact of these interventions. As the efforts to develop and implement  
11 **36** EHR-based data sharing platforms mature and scale up worldwide, there is a need to evaluate the impact  
12 **37** of these interventions and to weigh their relative risks and benefits, in order to inform evidence-based  
13 **38** health policies. The aim of this work is to systematically characterise and appraise the demonstrated  
14 **39** benefits and risks of sharing EHR with patients, by mapping them across the six domains of quality of  
15 **40** care of the Institute of Medicine (IOM) analytical framework (*i.e.* patient-centredness, effectiveness,  
16 **41** efficiency, timeliness, equity and safety).  
17  
18  
19  
20  
21  
22  
23 **42**

24  
25 **43** Methods and analysis: CINAHL, Cochrane, Embase, HMIC, Medline/PubMed and PsycINFO databases  
26 **44** will be searched from January 1997 to August 2017. Primary outcomes will include measures related with  
27 **45** the six domains of quality of care of the IOM analytical framework (*i.e.* patient-centredness,  
28 **46** effectiveness, efficiency, timeliness, equity and safety). Valid studies will be assessed for their quality by  
29 **47** two independent researchers, using the Cochrane Risk of Bias Tool, the ROBINS-I tool and the  
30 **48** Drummond's checklist. A narrative synthesis will be conducted for all included studies. Subgroup  
31 **49** analysis will be performed by domain of quality of care domain and by time scale (*i.e.* short-, medium- or  
32 **50** long-term impact). The body of evidence will be summarised in a Summary of Findings table and the  
33 **51** strength of the body of evidence will be assessed according to the GRADE criteria. This protocol was  
34 **52** registered in PROSPERO (CRD42017070092).  
35  
36  
37  
38  
39  
40  
41  
42  
43  
44  
45  
46  
47  
48  
49  
50  
51  
52  
53  
54  
55  
56  
57  
58  
59  
60

**54** Ethics and dissemination: Findings will be disseminated widely through peer-reviewed publication and  
**55** conference presentations.  
**56**  
**57**  
**58**  
**59**  
**60**

1  
2  
3 **61 Strengths and limitations of this study**  
4

- 5 62 • Comprehensive characterisation of interventions sharing EHR with patients  
6  
7 63 • Summary and appraisal of existing evidence on the potential benefits and risks of these interventions,  
8  
9 64 grouped by domain of quality of care  
10  
11 65 • Map the contribution of these interventions in short-, medium- and long-term time frames, in order to  
12  
13 66 customise informed decisions in health policies  
14  
15 67 • Expected limitations include the heterogenous nature of the outcomes assessed and the potentially  
16  
17 68 reduced sample size in subgroup analyses, which may negatively impact the statistical power in data  
18  
19 69 synthesis.  
20  
21 70  
22  
23 71  
24  
25 72  
26  
27 73  
28  
29 74  
30  
31 75  
32  
33 76  
34  
35 77  
36  
37 78  
38  
39 79  
40  
41 80  
42  
43 81  
44  
45 82  
46  
47 83  
48  
49 84  
50  
51 85  
52  
53 86  
54  
55 87  
56  
57 88  
58  
59 89  
60 90

## 91 Introduction

92 Although, in England, patients have had the legal right to access their health records since 1998, access to  
93 paper-based health records is mediated by health professionals and data controllers, through a  
94 cumbersome procedural process [1]. Additionally, as health information is fragmented between different  
95 organisations and levels of care, data access requests are often unable to provide a comprehensive health  
96 history record [2, 3].

97 In the last decade, electronic health records (EHR), have emerged as a promising solution to enhance  
98 patients' access to centralised medical information [4]. The adoption of EHR by primary care practices,  
99 hospitals and other healthcare organizations has steadily increased in the last years. In England, the  
100 percentage of General Practice surgeries that allowed patients to access their medical records online  
101 increased from 3% to 97% between April 2014 and February 2016 [5]. Patients' willingness and ability to  
102 access their health information through web portals is influenced by both individual (*i.e.* age, ethnicity,  
103 education level, health literacy and health status) and by health care delivery factors (*i.e.* provider  
104 endorsement and portal usability) [6, 7]. Various EHR-based platforms are currently used to share health  
105 information with patients, including direct online access, with or without patient-provider communication  
106 systems [8, 9] and health maintenance reminders [10, 11]. As these efforts mature and scale up  
107 worldwide, there is a need to evaluate the impact of interventions sharing EHR with patients, in order to  
108 weigh their relative risks and benefits and inform evidence-based health policies.

109 The Institute of Medicine (IOM) identified six domains of health care quality: patient-centredness,  
110 effectiveness, efficiency, timeliness, equity and safety [12]. Patient-centredness ensures that the care  
111 provided respects and responds to individual patient preferences, needs and values, thus incorporating  
112 these in clinical decisions [12, 13]. Health care shall provide evidence-based services, which can be  
113 ultimately expressed as improvements in health outcomes (*i.e.* effectiveness) [14], while ensuring patient  
114 safety (*i.e.* prevention of errors and adverse effects associated with health care) [12]. Other aspects of  
115 quality of delivery of care include the minimisation of the waste of human, physical or economical  
116 resources (*i.e.* efficiency), the reduction of waits and harmful delays (*i.e.* timeliness) and the reduction of  
117 avoidable differences on the delivery of care between different groups of health care users (*i.e.* equity)  
118 [12, 15, 16].

119 Providing patients with access to their health records has been linked to theorised benefits in four major  
120 domains of health care quality: patient-centredness, effectiveness, safety and efficiency [17-19].  
121 However, despite the growing body of evidence on the theorised benefits of sharing EHR with patients on

1  
2  
3 122 these domains, there is still a considerable gap between the predicted and demonstrated benefits of these  
4 123 interventions [20].

6  
7 124 In order to analyse the effect of providing patients access to their medical records on quality outcomes,  
8 125 Davis-Giardina T. *et al* performed a systematic review including studies published between 1970 and  
9 126 2012 [21]. According to this work, a limited amount of evidence suggests that access to medical records  
11 127 improves patient satisfaction and enhances patient-provider communication [21]. Similarly, a systematic  
13 128 review from de Lusignan *et al.* reported that providing patients online access to their EHR increased  
14 129 convenience and satisfaction [22]. These findings are in line with the model proposed by Otte-Trojel T. *et*  
15 130 *al*, according to which sharing EHR with patients can improve both patient-provider communication and  
16 131 patient satisfaction, by increasing continuity of care and patient convenience, respectively [23].

19  
20 132 Conversely, no clear benefits were found on effectiveness [21]. Until 2012, only a few studies evaluated  
21 133 the impact on effectiveness studies, most focusing on type 2 diabetes and with inconsistent results.  
22 134 Tenforde *et al* showed that providing access to medical records was associated with lower glycated  
23 135 haemoglobin A1c values [24]; however, no significant effect was found in three other studies assessing  
24 136 diabetes-specific effectiveness measures [25, 26]. One of the limitations of this review consists in the  
25 137 inclusion of studies evaluating the impact of sharing both electronic and paper-based health records - and  
26 138 this heterogeneity might mask potential specific benefits and risks of sharing EHR with patients.  
27 139 Furthermore, as pointed by the authors, the paucity of papers published up to that date resulted in a  
28 140 tendency to include small and methodologically less robust studies, thus increasing the risk of selective  
29 141 reporting and/or publication bias [21]. Mold F. *et al* also performed a systematic review assessing the  
30 142 impact of providing patients with access to their EHR; based in studies published between 1999 and 2012,  
31 143 this work found a positive influence in patient safety [27].

32  
33 144 However, the authors were unable to find a consistent beneficial effect on efficiency measures (*i.e.*  
34 145 number of face-to-face visits and telephone appointments) in both reviews [21, 27]. While some studies  
35 146 reported an increase in the number of face-to-face consultations [8, 28] , others document a decrease [11,  
36 147 29, 30]. Similarly, inconsistent results were found regarding the impact on telephone consultations: only  
37 148 one study reported a decline in the total number [31], whilst six other studies reported either no change or  
38 149 an increase [9, 28-30, 32, 33]. It is important to note, however, that most of the included studies assessing  
39 150 efficiency measures included in this review showed a high risk of bias, mostly related to either unclear or  
40 151 absent blinding methods [27].

41  
42 152 The landmark reviews of Mold F. *et al* [27], Davis-Giardina T. *et al* [21], Ammenwerth E. *et al* [34] and  
43 153 Goldweig CL *et al* [7] provide a comprehensive characterisation of the literature published until 2013,  
44  
45  
46  
47  
48  
49  
50  
51  
52

1  
2  
3 154 highlighting the paucity and the scientific limitations of the evidence published until that date. Although  
4  
5 155 these reviews were unable to demonstrate clear benefits on efficiency and effectiveness measures, the  
6  
7 156 debates around patients' rights and data ownership in the digital era, and the need to improve patient-  
8  
9 157 centredness of health care delivery have acted as strong drivers to allocate resources to interventions and  
10  
11 158 platforms aiming to share EHR with patients. As consequence of these efforts, it is plausible that studies  
12  
13 159 performed in the last 5 years can provide further clarification for this evidence gap.

14  
15 160 Furthermore, systematic reviews performed to the date do not address all domains of quality of care; in  
16  
17 161 particular, the impact of sharing EHR with patients on timeliness or equity has not been addressed [7, 21,  
18  
19 162 27, 34, 35]. This is a particularly relevant gap in knowledge, given that interventions aimed at improving  
20  
21 163 the quality of care do not necessarily improve all specific domains, and may even have a deleterious  
22  
23 164 effect in some of them.

24  
25 165 This review will expand on the above-mentioned work, in order to identify recent methodological and  
26  
27 166 scientific progress until June 2017. Following the PRISMA-P checklist as guidance [36], we propose a  
28  
29 167 systematic and reproducible strategy to query the literature on the demonstrated benefits and risks of  
30  
31 168 sharing EHR with patients and map these results in a comprehensive framework of health care quality  
32  
33 169 measures.

34  
35 170

### 36 37 171 **Research aims**

38  
39 172 The main objectives of this review are: 1) to systematically characterise interventions sharing EHR with  
40  
41 173 patients; and 2) to assess the demonstrated risks and benefits of these interventions on patient-  
42  
43 174 centredness, effectiveness, safety, efficiency, timeliness and equity, compared to usual care (no  
44  
45 175 intervention). As secondary aim, we will map the contribution of these interventions in short-, medium-  
46  
47 176 and long-term timeframes (Figure 1).

48  
49 177

### 50 51 178 **Methods and analysis**

#### 52 53 179 *Search strategy*

54  
55 180 The search strategy will be performed using resources that enhance methodological transparency and  
56  
57 181 improve the reproducibility of the results and evidence synthesis. A search of the literature from the last  
58  
59 182 20 years (January 1997 – August 2017) will be performed on CINAHL, Cochrane, Embase, HMIC,  
60  
183 Medline/PubMed and PsycINFO. Search strings (Table 1) will combine free terms and controlled

1  
2  
3 184 vocabulary, whenever supported. We will also search grey literature sources, including registrations in the  
4 185 International Prospective Register of Systematic Reviews (PROSPERO), reports of relevant stakeholder  
5 186 organisations (NHS Digital, AMIA, eHealth at WHO, International Society for Telemedicine and  
6 187 eHealth), and conference proceedings (last 5 years) of several related conferences (American Medical  
7 188 Informatics Association [AMIA], MedInfo, Medicine 2.0, Medicine X), in order to identify possible  
8 189 additional studies that meet the inclusion criteria. Language restrictions will be applied and only articles  
9 190 in English will be included.  
10  
11  
12  
13  
14

15 191

### 17 192 *Study selection criteria*

19 193 A summary of the participants, interventions, comparators and outcomes (PICO) considered, as well as  
20 194 the type of studies included, is provided in Table 2.

23 195 The systematic review will focus on studies on adult subjects, including both patients and carers (mean  
24 196 age of study sample  $\geq 16$  years). The systematic review does not focus on a particular disease area or  
25 197 health system setting as it intends to comprehensively characterise the scope of interventions sharing EHR  
26 198 with patients.  
27  
28  
29

30 199 Studies assessing the impact of sharing EHR with patients, either isolated or as part of a multicomponent  
31 200 intervention, will be included. Included interventions will comprise: 1) web-based patient access to EHR;  
32 201 2) EHR-based health reminders / messaging or 3) online patient-provider communication systems (health  
33 202 information exchange platforms). Studies focusing on health reminders only (not EHR-based) or  
34 203 appointment reminders will not be considered. The comparator will be 'no intervention' (e.g. usual care).  
35  
36  
37  
38

39 204 Primary outcomes will include any measure related to a) patient-centredness (e.g. patient-reported  
40 205 experience measures (PREMs), b) effectiveness (e.g. health outcomes); c) patient safety (e.g.  
41 206 identification of medication discrepancies); d) efficiency (e.g. economic evaluation measures and proxies;  
42 207 including service costs, number of consultations/admissions, e) timeliness (e.g. waiting lists, time-to-  
43 208 treatment) and f) equity (e.g. discrepancies in quality measures between different groups of patients)  
44 209 (Figure 1). Studies that only report cognitive outcomes (e.g. intent), motivational outcomes or other  
45 210 subjective psychological measures will be excluded. The types of study considered in this systematic  
46 211 review will be a) randomised controlled trials; b) cluster randomised trials; c) quasi-experimental studies;  
47 212 d) case-control studies, e) cohort studies and f) cost-effectiveness studies. The reference lists of  
48 213 systematic reviews identified in this search will also be screened to ensure all eligible studies are  
49 214 captured.  
50  
51  
52  
53  
54  
55  
56  
57  
58  
59  
60

1  
2  
3 215 *Screening and data extraction*  
4

5 216 Quantitative studies will be independently assessed by three reviewers and reported using the  
6  
7 217 Preferred Reporting Items for Systematic Reviews and Meta-Analyses (PRISMA-P) flow  
8  
9 218 diagram [36]. Initial screening of studies will be based on the information contained in their titles  
10  
11 219 and abstracts and will be conducted by two independent investigators. Full-paper screening will  
12  
13 220 be conducted by the same independent investigators. Cohen's kappa will be used to measure  
14  
15 221 inter-coder agreement in each screening phase. When there are doubts regarding inclusion or  
16  
17 222 exclusion, a third investigator will be involved in the decision. Two independent investigators  
18  
19 223 will extract information from the included studies into a standardized form. The data collected  
20  
21 224 for each study will include: name of the first author, year of publication, technology, intervention  
22  
23 225 components and characteristics, study duration, participants' and setting characteristics,  
24  
25 226 outcomes and retention rates. Two investigators will review the abstraction form for consistency.  
26  
27 227 Disagreements will be resolved by a third investigator.  
28

29 229 *Quality assessment*  
30

31 230 The quality of randomised controlled trials and cluster randomized trials will be assessed using the  
32  
33 231 Cochrane Risk of Bias Tool [37], that assesses the following study-level aspects: a) randomisation  
34  
35 232 sequence allocation; b) allocation concealment; c) blinding; d) completeness of outcome data and e)  
36  
37 233 selective outcome reporting. The quality of non-randomised intervention studies (*i.e.* case control, cohort,  
38  
39 234 quasi-experimental) will be appraised using the ROBINS-I tool, which assesses bias due to a)  
40  
41 235 confounding, b) selection of participants, c) classification of interventions, d) deviations from intended  
42  
43 236 interventions, e) missing data, f) measurement of outcomes and g) selection of reported results [38]. For  
44  
45 237 cost-effectiveness studies, the Drummond's checklist for assessing economic evaluations will be used  
46  
47 238 [39]. Two independent reviewers will score the selected studies and disagreements will be resolved by a  
48  
49 239 third person.

50  
51 240 The risk of bias for each outcome across individual studies will be summarised as a narrative statement,  
52  
53 241 and supported by a risk of bias table. A review-level narrative summary of the risk of bias will also be  
54  
55 242 provided.  
56

57 243  
58

59 244  
60



1  
2  
3 245 *Descriptive analysis and meta-analysis*  
4

5 246 Planned subgroup analysis will be performed by domain of quality of care (IOM framework) and by time  
6 247 scale (*i.e.* short-, medium- or long-term impact). For studies with a high or unclear risk of bias, defined as  
7 248 high or unclear risk in 50% or more of the quality assessment outcomes, a narrative description of the risk  
8 249 of bias will be provided. Risk of bias assessments will be incorporated into synthesis by performing  
9 250 sensitivity analysis (*i.e.* limiting to studies at lowest risk of bias in a secondary analysis). Depending on  
10 251 the amount of information retrieved, subgroup analysis will also be performed for specific diseases.

11  
12  
13  
14  
15 252 A narrative synthesis will be conducted for all the included studies. Parallel-group trials that are deemed  
16 253 comparable in relevant ways will be pooled together for a summary effect. Whenever possible,  
17 254 continuous and dichotomous outcomes will be pooled together for meta-analysis purposes. All effect sizes  
18 255 will be transformed into a common metric, in order to make them comparable across studies — the bias-  
19 256 corrected standardized difference in means (Hedges'  $g$ ) — classified as positive when in favor of the  
20 257 intervention and negative when in favor of the control. Heterogeneity will be assessed using  $I^2$ . The  
21 258 presence of publication bias will be evaluated by use of a funnel plot and the Duval and Tweedie's trim  
22 259 and fill method [40].

23  
24  
25  
26  
27  
28  
29 260 The body of evidence will be summarised in a Summary of Findings table and the strength of the body of  
30 261 evidence will be assessed according to GRADE criteria [41].  
31  
32

33 262

34  
35 263 *Patient and public involvement*  
36

37 264 Our research question emerged from the implementation evaluation of the Care Information Exchange  
38 265 (CIE), a pilot web portal/patient-controlled EHR happening across a 2.4 million population in North West  
39 266 London. CIE implementation evaluation was shaped by its steering group, which included lay partners,  
40 267 and their perspectives reinforced that our research question was relevant and aligned with  
41 268 patients' interest.

42  
43  
44 269 Patients were not directly involved in the design of this study. As this is a protocol for a systematic  
45 270 review and no participant recruitment will take place, their involvement on the recruitment and  
46 271 dissemination of findings to participants was not applicable.

47  
48  
49 272 However, patient partners will be included in the interpretation of our results, in the co-development of a  
50 273 dissemination strategy, and in summarising the research findings into lay summaries and reports, in order  
51 274 to raise awareness and stimulate public participation on this topic.  
52  
53

54 275  
55  
56  
57  
58  
59



1  
2  
3 276 *Amendments*  
4

5 277 Any amendments to this protocol will be documented with reference to saved searches and analysis  
6  
7 278 methods, which will be recorded in bibliographic databases (Ovid), Endnote, and Excel templates for data  
8  
9 279 collection and synthesis.  
10

11 280  
12  
13  
14  
15  
16  
17  
18  
19  
20  
21  
22  
23  
24  
25  
26  
27  
28  
29  
30  
31  
32  
33  
34  
35  
36  
37  
38  
39  
40  
41  
42  
43  
44  
45  
46  
47  
48  
49  
50  
51  
52  
53  
54  
55  
56  
57  
58  
59  
60

**281 Discussion**

282 As the implementation of interventions to share EHR with patients scales up worldwide, the systematic  
283 evaluation of their impact emerges as a priority research topic.

284 One of the strengths of the proposed study is to apply a reproducible and transparent procedure for  
285 systematic review of the literature. In this protocol, we clearly describe the types of studies, participants,  
286 interventions, and outcomes that will be included, as well as the data sources, search strategy, data  
287 extraction methods (including quality assessment) and methods of combining data [42]. By publishing the  
288 research protocol, we reinforce the clarity of the strategy and minimise the risk of bias, namely selective  
289 outcome reporting [37]. Second, we will focus solely on the impact of EHR-based studies, increasing the  
290 sensitivity to detect specific benefits of this type of intervention. Third, for the first time, we aim to  
291 comprehensively evaluate both the benefits and risks of these interventions in a wide range of domains of  
292 quality of care, as defined by the IOM, and in diverse time frames. This results shall provide high-level  
293 information to inform, support and customise decisions in health policies.

294 Potential limitations of this study include the heterogeneity of measures and outcomes evaluated and the  
295 potentially reduced number of studies in subgroup analyses, which may negatively influence the statistical  
296 power in data synthesis.

297

298

299

300

301

302

303

304

305

306

307

308

309

310

1  
2  
3 **311 Acknowledgements**  
4

5  
6 312 We thank Jacqueline Cousins (Library Manager and Liaison Librarian at Imperial College London) for  
7 313 the support improving the composition of the search terms and procedural aspects of the search strategy.  
8  
9 314 We would also like to acknowledge Dr Søren Rud Kristensen (Senior Lecturer in Health Economics at the  
10 315 Centre for Health Policy at the Institute of Global Health Innovation) and Dr Joachim Marti (Senior  
11 316 Lecturer in Health Economics at the Centre for Health Policy at the Institute of Global Health Innovation)  
12 317 for their advices regarding the quality appraisal of cost-effectiveness studies, and Miss Anna Lawrence-  
13  
14 318 Jones (Patient and Public Involvement and Engagement Manager at Imperial National Institute for Health  
15 319 Research (NIHR) Patient Safety Translation Research Centre) for the useful discussions around public  
16  
17 320 and patient involvement.  
18  
19  
20 321

21  
22 **322 Ethics and dissemination**  
23

24 323 Not applicable.  
25  
26 324

27  
28 **325 Authors' contributions**  
29

30  
31 326 ALN, AC and EKM conceptualised this research. ALN, AC and LL designed the protocol. ALN and LF  
32 327 defined the concepts and search items. EKM and AD contributed to the conceptualisation and commented  
33  
34 328 on the multiple versions of the protocol. The manuscript was written by ALN with contributions from all  
35  
36 329 authors.  
37  
38 330

39  
40 **331 Funding statement**  
41

42 332 This work is supported by the Sowerby Program and by the National Institute for Health Research  
43 333 (NIHR) Patient Safety Translation Research Centre. The views of the authors do not necessarily reflect  
44  
45 334 those of the NHS, NIHR or the Department of Health.  
46  
47 335

48  
49  
50 **336 Competing interests' statement**  
51

52 337 We declare no conflict(s) of interest associated with this research.  
53  
54 338

1  
2  
3  
4  
5  
6  
7  
8  
9  
10  
11  
12  
13  
14  
15  
16  
17  
18  
19  
20  
21  
22  
23  
24  
25  
26  
27  
28  
29  
30  
31  
32  
33  
34  
35  
36  
37  
38  
39  
40  
41  
42  
43  
44  
45  
46  
47  
48  
49  
50  
51  
52  
53  
54  
55  
56  
57  
58  
59  
60

339 **Data sharing statement**

340 No additional data relevant to this protocol are available for distribution. All relevant data and search  
341 terms are published in this manuscript.

342

For peer review only

343 **Table 1. Concepts and search items**

| Database                                                                                                                                                                | Search items                                                                                                                                                                                                                                                                                                                                                                                                                                                                                                                                                                                                                                                                                                                                                                                                                                                                                                                                                                                                                                                                                                                                                                                                           |
|-------------------------------------------------------------------------------------------------------------------------------------------------------------------------|------------------------------------------------------------------------------------------------------------------------------------------------------------------------------------------------------------------------------------------------------------------------------------------------------------------------------------------------------------------------------------------------------------------------------------------------------------------------------------------------------------------------------------------------------------------------------------------------------------------------------------------------------------------------------------------------------------------------------------------------------------------------------------------------------------------------------------------------------------------------------------------------------------------------------------------------------------------------------------------------------------------------------------------------------------------------------------------------------------------------------------------------------------------------------------------------------------------------|
| <b>CINAHL via EBSCO</b>                                                                                                                                                 | <ol style="list-style-type: none"> <li>1. (((electronic* or online or on-line or digital*) N1 (health record* or medical record* or personal record* or patient record*)) or EHR# or EMR# or ephr#)</li> <li>2. ((information or data) N4 (shar* or exchange*)) or HIE or HIEs or access*)</li> <li>3. #1 and #2</li> <li>4. (((experience or satisfaction) N4 (patient* or consumer* or client* or survey or questionnaire*)) or PREM* or patient-reported experience measure*)</li> <li>5.(effectiveness or health outcome*)</li> <li>6. (patient N1 (safety or harm)) or safety manag* or accident prevent* or error* or medication reconcil* or near miss*</li> <li>7. (efficiency or economic* or cost* or expenditure* or charge* or fee*1 or (number N1 appointment*) or (number adj2 admission*) or (number N1 telephone visit*))</li> <li>8. waiting lists or timeliness or time-to-treatment</li> <li>9. health equity</li> <li>10. #4 or #5 or #6 or #7 or #8 or #9</li> <li>13. 3 and 10</li> </ol>                                                                                                                                                                                                        |
| <b>Cochrane via url:</b><br><a href="http://onlinelibrary.wiley.com/cochranelibrary/search/advanced">http://onlinelibrary.wiley.com/cochranelibrary/search/advanced</a> | <ol style="list-style-type: none"> <li>1. (((electronic* or online or on-line or digital*) near/1 (health record* or medical record* or personal record* or patient record*)) or EHR or EHRs or EMR or EMRs or ephr or ephrs)</li> <li>2. Electronic Health Records [MesH]</li> <li>3. #1 or #2</li> <li>4. (((information or data) near/4 (shar* or exchange*)) or HIE or HIES or access*)</li> <li>5. Information Dissemination [MesH]</li> <li>6. #4 or #5</li> <li>7. #3 and #6</li> <li>8. (((experience or satisfaction) near/4 (patient* or consumer* or client* or survey or questionnaire*)) or PREM* or patient-reported experience measure*)</li> <li>9. (effectiveness or health outcome*)</li> <li>10. (patient near/1 safety) or (patient near/1 harm) or safety manag* or accident prevent* or error* or medication reconcil*</li> <li>11. (efficiency or economic* or cost* or expenditure* or charge* or fee* or (number near/1 appointment*) or (number near/1 admission*) or (number near/1 telephone visit*))</li> <li>12. time-to-treatment or timeliness</li> <li>13. waiting lists [MesH]</li> <li>14. health equity [MesH]</li> <li>15. #8 or #9 or #10 or #11 or #12 or #13 or #14</li> </ol> |

|                                                                                                                                                                                                                                                  |                                                                                                                                                                                                                                                                                                                                                                                                                                                                                                                                                                                                                                                                                                                                                                                                                                                                                                                                                                                                                                                                                |
|--------------------------------------------------------------------------------------------------------------------------------------------------------------------------------------------------------------------------------------------------|--------------------------------------------------------------------------------------------------------------------------------------------------------------------------------------------------------------------------------------------------------------------------------------------------------------------------------------------------------------------------------------------------------------------------------------------------------------------------------------------------------------------------------------------------------------------------------------------------------------------------------------------------------------------------------------------------------------------------------------------------------------------------------------------------------------------------------------------------------------------------------------------------------------------------------------------------------------------------------------------------------------------------------------------------------------------------------|
| <p>1<br/>2<br/>3<br/>4<br/>5<br/>6<br/>7<br/>8<br/>9<br/>10<br/>11<br/>12<br/>13<br/>14<br/>15<br/>16<br/>17<br/>18<br/>19<br/>20<br/>21<br/>22<br/>23<br/>24<br/>25<br/>26<br/>27<br/>28<br/>29<br/>30<br/>31</p> <p><b>Embase via Ovid</b></p> | <p>17. 7 and 15</p> <p>1. (((electronic* or online or on-line or digital*) adj2 (health record* or medical record* or personal record* or patient record*)) or EHR? or EMR? or ephr?)</p> <p>2. Electronic health record/</p> <p>3. 1 or 2</p> <p>4. (((information or data) adj5 (shar* or exchang*)) or HIE*2 or access*)</p> <p>5. Information dissemination/</p> <p>6. 4 or 5</p> <p>7. 3 and 6</p> <p>8. (((experience or satisfaction) adj5 (patient* or consumer* or client* or survey or questionnaire*)) or PREM* or patient-reported experience measure*)</p> <p>9. (effectiveness or health outcome*) 10. (patient adj2 (safety or harm)) or safety manag* or accident prevent* or error* or medication reconcil* or near miss*</p> <p>11. (efficiency or economic* or cost* or expenditure* or charge* or fee*1 or (number adj2 appointment*) or (number adj2 admission*) or (number adj2 telephone visit*))</p> <p>12. waiting list* or time to treatment/ or timeliness</p> <p>13. health equity/</p> <p>14. 8 or 9 or 10 11 or 12 or 13</p> <p>15. 7 and 14</p> |
| <p>32<br/>33<br/>34<br/>35<br/>36<br/>37<br/>38<br/>39<br/>40<br/>41<br/>42<br/>43<br/>44<br/>45<br/>46<br/>47<br/>48<br/>49<br/>50<br/>51<br/>52<br/>53<br/>54<br/>55<br/>56<br/>57<br/>58<br/>59<br/>60</p> <p><b>HMIC via Ovid</b></p>        | <p>1. (((electronic* or online or on-line or digital*) adj2 (health record* or medical record* or personal record* or patient record*)) or EHR? or EMR? or ephr?)</p> <p>2. Electronic patient records/</p> <p>3. 1 or 2</p> <p>4. (((information or data) adj5 (shar* or exchang*)) or HIE*2 or access*)</p> <p>5. Information exchange/</p> <p>6. 4 or 5</p> <p>7. 3 and 6</p> <p>8. (((experience or satisfaction) adj5 (patient* or consumer* or client* or survey or questionnaire*)) or PREM* or patient-reported experience measure*)</p> <p>9. (effectiveness or health outcome*) 10. (patient adj2 (safety or harm)) or safety manag* or accident prevent* or error* or medication reconcil* or near miss*</p> <p>11. (efficiency or economic* or cost* or expenditure* or charge* or fee*1 or (number adj2 appointment*) or (number adj2 admission*) or (number adj2 telephone visit*))</p> <p>12. waiting lists/ or patient waiting time or timeliness</p> <p>13. health inequalities/ or equity</p>                                                                |

|                          |                                                                                                                                                                                                                                                                                                                                                                                                                                                                                                                                                                                                                                                                                                                                                                                                                                                                                                                                                                                                                           |
|--------------------------|---------------------------------------------------------------------------------------------------------------------------------------------------------------------------------------------------------------------------------------------------------------------------------------------------------------------------------------------------------------------------------------------------------------------------------------------------------------------------------------------------------------------------------------------------------------------------------------------------------------------------------------------------------------------------------------------------------------------------------------------------------------------------------------------------------------------------------------------------------------------------------------------------------------------------------------------------------------------------------------------------------------------------|
|                          | <p>14. 8 or 9 or 10 or 11 or 12 or 13<br/>15. 7 and 14</p>                                                                                                                                                                                                                                                                                                                                                                                                                                                                                                                                                                                                                                                                                                                                                                                                                                                                                                                                                                |
| <b>Medline via Ovid</b>  | <p>1. (((electronic* or online or on-line or digital*) adj2 (health record* or medical record* or personal record* or patient record*)) or EHR? or EMR? or ephr?)<br/>2. Electronic Health Records/<br/>3. 1 or 2<br/>4. (((information or data) adj5 (shar* or exchang*)) or HIE*2 or access*<br/>5. Information Dissemination/<br/>6. 4 or 5<br/>7. 3 and 6<br/>8. (((experience or satisfaction) adj5 (patient* or consumer* or client* or survey or questionnaire*)) or PREM* or patient-reported experience measure*)<br/>9. (effectiveness or health outcome*)<br/>10. ((patient adj2 (safety or harm)) or safety manag* or accident prevent* or error* or medication reconcil* or near miss*)<br/>11. (efficiency or economic* or cost* or expenditure* or charge* or fee*1 or (number adj2 appointment*) or (number adj2 admission*) or (number adj2 telephone visit*))<br/>12. Waiting Lists/ or Time-to-treatment/ or timeliness<br/>13. Health Equity/<br/>14. 8 or 9 or 10 or 11 or 12 or 13 15. 7 and 14</p> |
| <b>PsycINFO via Ovid</b> | <p>1. (((electronic* or online or on-line or digital*) adj2 (health record* or medical record* or personal record* or patient record*)) or EHR? or EMR? or ephr?)<br/>2. (((information or data) adj5 (shar* or exchang*)) or HIE*2 or access*<br/>3. 1 and 2<br/>4. (((experience or satisfaction) adj5 (patient* or consumer* or client* or survey or questionnaire*)) or PREM* or patient-reported experience measure*)<br/>5. (effectiveness or health outcome*)<br/>6. (patient adj2 (safety or harm)) or safety manag* or accident prevent* or error* or medication reconcil* or near miss*<br/>7. (efficiency or economic* or cost* or expenditure* or charge* or fee*1 or (number adj2 appointment*) or (number adj2 admission*) or (number adj2 telephone visit*))<br/>8. waiting list* or time-to-treatment or timeliness<br/>9. equity or health disparities/<br/>10. 4 or 5 or 6 or 7 or 8 or 9<br/>11. 3 and 10</p>                                                                                          |

344 Search themes (facets) and terms derived for each theme relating to the use of EHR and predicted benefits  
345 (patient experience, effectiveness and efficiency)

**Table 2. Inclusion and exclusion criteria**

|                     | <b>Inclusion criteria</b>                                                                                                                                                                                                                                                                                                                                                                                                                              | <b>Exclusion criteria</b>                                                                                                         |
|---------------------|--------------------------------------------------------------------------------------------------------------------------------------------------------------------------------------------------------------------------------------------------------------------------------------------------------------------------------------------------------------------------------------------------------------------------------------------------------|-----------------------------------------------------------------------------------------------------------------------------------|
| <b>Population</b>   | Adult subjects (patients and carers)                                                                                                                                                                                                                                                                                                                                                                                                                   | Individuals 16 years of age and under (e.g. mean age of study sample <16)                                                         |
| <b>Intervention</b> | Electronic health record-based interventions, including: <ul style="list-style-type: none"> <li>• Patient access to EHR</li> <li>• EHR-based reminders / messaging</li> <li>• Unidirectional or bidirectional online patient-provider communication systems (care information exchange platforms);</li> </ul>                                                                                                                                          | <ul style="list-style-type: none"> <li>• Health reminders only</li> </ul>                                                         |
| <b>Comparison</b>   | No intervention (e.g. usual care)                                                                                                                                                                                                                                                                                                                                                                                                                      |                                                                                                                                   |
| <b>Outcome</b>      | Any measure related to a) patient-centredness (e.g. PREMs), b) effectiveness (e.g. health outcomes); c) patient safety (e.g. identification of medication discrepancies); d) efficiency (e.g. economic evaluation measures and proxies; including service costs, number of consultations/admissions, e) timeliness (e.g. waiting lists, time-to-treatment) or f) equity (e.g. discrepancies in quality measures between different groups of patients). | Studies that only report cognitive outcomes (e.g. intention to), motivational outcomes or other subjective psychological measures |
| <b>Study type</b>   | Randomised controlled trials, cluster randomised trials, quasi-experimental, case-control, cohort studies, cost-effectiveness                                                                                                                                                                                                                                                                                                                          |                                                                                                                                   |

346

347



348 **Reference**

- 349 1. Dimond, B., *Rights to information access under the Data Protection Act*. British Journal of  
350 Nursing, 2005. **14**(14): p. 774-6.
- 351 2. Stange, K.C., *The problem of fragmentation and the need for integrative solutions*. Annals of  
352 Family Medicine, 2009. **7**(2): p. 100-3.
- 353 3. Roukema, J., et al., *Paper versus computer: feasibility of an electronic medical record in general*  
354 *pediatrics*. Pediatrics, 2006. **117**(1): p. 15-21.
- 355 4. Vest, J.R., *Health information exchange: national and international approaches*. Advances in  
356 Health Care Management, 2012. **12**: p. 3-24.
- 357 5. Houses of Parliament, *EHR House of Parliament Report*. 2016.
- 358 6. Irizarry, T., A. DeVito Dabbs, and C.R. Curran, *Patient Portals and Patient Engagement: A State of*  
359 *the Science Review*. Journal of Medical Internet Research, 2015. **17**(6): p. e148.
- 360 7. Goldzweig, C.L., et al., *Electronic patient portals: evidence on health outcomes, satisfaction,*  
361 *efficiency, and attitudes: a systematic review*. Annals of Internal Medicine, 2013. **159**(10): p.  
362 677-87.
- 363 8. Delbanco, T., et al., *Inviting patients to read their doctors' notes: a quasi-experimental study and*  
364 *a look ahead*. Annals of Internal Medicine, 2012. **157**(7): p. 461-70.
- 365 9. Katz, S.J., N. Nissan, and C.A. Moyer, *Crossing the digital divide: evaluating online*  
366 *communication between patients and their providers*. The American Journal of Managed Care,  
367 2004. **10**(9): p. 593-8.
- 368 10. Wright, A., et al., *Randomized controlled trial of health maintenance reminders provided directly*  
369 *to patients through an electronic PHR*. Journal of General Internal Medicine, 2012. **27**(1): p. 85-  
370 92.
- 371 11. Nagykaldi, Z., et al., *Impact of a Wellness Portal on the delivery of patient-centered preventive*  
372 *care*. Journal of the American Board of Family Medicine, 2012. **25**(2): p. 158-67.
- 373 12. America, I.o.M.C.o.Q.o.H.C.i., *Crossing the Quality Chasm: A New Health System for the 21st*  
374 *Century*. 2001, Washington (DC): National Academies Press.
- 375 13. Scholl, I., et al., *An integrative model of patient-centeredness - a systematic review and concept*  
376 *analysis*. PloS One, 2014. **9**(9): p. e107828.
- 377 14. Arah, O.A., et al., *Conceptual frameworks for health systems performance: a quest for*  
378 *effectiveness, quality, and improvement*. Journal of the International Society for Quality in  
379 Health Care, 2003. **15**(5): p. 377-98.
- 380 15. Hussey, P.S., et al., *A systematic review of health care efficiency measures*. Health services  
381 Research, 2009. **44**(3): p. 784-805.
- 382 16. World Health Organisation, *Health Systems: Equity*, 2017. Available at  
383 <http://www.who.int/healthsystems/topics/equity/en/>. Last access: 26<sup>th</sup> March 2018.
- 384 17. Wagner, K.A., F.W. Lee, and J.P. Glaser, *Healthcare information systems: A practical approach*  
385 *for health care management.*, J.W. Sons. 2013.
- 386 18. Department of Health, *The power of information: giving people control of the health and care*  
387 *information they need*, 2012. Available at: [https://www.gov.uk/government/publications/giving-](https://www.gov.uk/government/publications/giving-people-control-of-the-health-and-care-information-they-need)  
388 [people-control-of-the-health-and-care-information-they-need](https://www.gov.uk/government/publications/giving-people-control-of-the-health-and-care-information-they-need). Last access: 26<sup>th</sup> March 2018.
- 389 19. Ross, S.E. and C.-T. Lin, *The effects of promoting patient access to medical records: a review*.  
390 Journal of the American Medical Informatics Association, 2003. **10**(2): p. 129-38.
- 391 20. Jilka, S.R., et al., *"Nothing About Me Without Me": An Interpretative Review of Patient Accessible*  
392 *Electronic Health Records*. Journal of Medical Internet Research, 2015. **17**(6): p. e161.

- 1  
2  
3 393 21. Davis Giardina, T., et al., *Patient access to medical records and healthcare outcomes: a*  
4 394 *systematic review*. Journal of the American Medical Informatics Association, 2014. **21**(4): p. 737-  
5 395 41.
- 6 396 22. de Lusignan, S., et al., *Patients' online access to their electronic health records and linked online*  
7 397 *services: a systematic interpretative review*. BMJ Open, 2014. **4**(9): p. e006021.
- 8 398 23. Otte-Trojel, T., et al., *How outcomes are achieved through patient portals: a realist review*.  
9 399 Journal of the American Medical Informatics Association, 2014. **21**(4): p. 751-7.
- 10 400 24. Tenforde, M., et al., *The association between personal health record use and diabetes quality*  
11 401 *measures*. Journal of General Internal Medicine, 2012. **27**(4): p. 420-4.
- 12 402 25. McCarrier, K.P., et al., *Web-based collaborative care for type 1 diabetes: a pilot randomized trial*.  
13 403 Diabetes Technology & Therapeutics, 2009. **11**(4): p. 211-7.
- 14 404 26. Grant, R.W., et al., *Practice-linked online personal health records for type 2 diabetes mellitus: a*  
15 405 *randomized controlled trial*. Archives of Internal Medicine, 2008. **168**(16): p. 1776-82.
- 16 406 27. Mold, F., et al., *Patients' online access to their electronic health records and linked online*  
17 407 *services: a systematic review in primary care*. The British Journal of General Practice, 2015.  
18 408 **65**(632): p. e141-51.
- 19 409 28. Palen, T.E., et al., *Association of online patient access to clinicians and medical records with use*  
20 410 *of clinical services*. Journal of the American Medical Association, 2012. **308**(19): p. 2012-9.
- 21 411 29. Bergmo, T.S., et al., *Electronic patient-provider communication: will it offset office visits and*  
22 412 *telephone consultations in primary care?* International Journal of Medical Informatics, 2005.  
23 413 **74**(9): p. 705-10.
- 24 414 30. Zhou, Y.Y., et al., *Patient access to an electronic health record with secure messaging: impact on*  
25 415 *primary care utilization*. The American Journal of Managed Care, 2007. **13**(7): p. 418-24.
- 26 416 31. Kummervold, P.E., et al., *[Patient-physician interaction over the internet]*. Tidsskr Nor  
27 417 Laegeforen. 2004 Oct 21;124(20):2633-6.
- 28 418 32. Lin, C.-T., et al., *An Internet-based patient-provider communication system: randomized*  
29 419 *controlled trial*. Journal of Medical Internet Research, 2005. **7**(4): p. e47.
- 30 420 33. Katz, S.J., et al., *Effect of a triage-based E-mail system on clinic resource use and patient and*  
31 421 *physician satisfaction in primary care: a randomized controlled trial*. Journal of General Internal  
32 422 Medicine, 2003. **18**(9): p. 736-44.
- 33 423 34. Ammenwerth, E., P. Schnell-Inderst, and A. Hoerbst, *The impact of electronic patient portals on*  
34 424 *patient care: a systematic review of controlled trials*. Journal of Medical Internet research, 2012.  
35 425 **14**(6): p. e162.
- 36 426 35. Ammenwerth, E., et al., *Adult patient access to electronic health records (Protocol)*. Cochrane  
37 427 Database of Systematic Reviews 2017(6): p. CD012707.
- 38 428 36. Moher, D., et al., *Preferred reporting items for systematic review and meta-analysis protocols*  
39 429 *(PRISMA-P) 2015 statement*. Systematic Reviews, 2015. **4**: p. 1.
- 40 430 37. Higgins, J. and S. Green, *Cochrane Handbook for Systematic Reviews of Interventions*. 2008,  
41 431 Chichester, UK: John Wiley & Sons.
- 42 432 38. Sterne, J.A., et al., *ROBINS-I: a tool for assessing risk of bias in non-randomised studies of*  
43 433 *interventions*. British Medical Journal, 2016. **355**: p. i4919.
- 44 434 39. M., D., *Methods for the economic evaluation of health care programmes*. 2nd Edition ed, ed.  
45 435 O.U. Press. 1997.
- 46 436 40. Duval, S. and R. Tweedie, *Trim and fill: A simple funnel-plot-based method of testing and*  
47 437 *adjusting for publication bias in meta-analysis*. Biometrics, 2000. **56**(2): p. 455-63.
- 48 438 41. Guyatt, G.H., et al., *GRADE: an emerging consensus on rating quality of evidence and strength of*  
49 439 *recommendations*. British Medical Journal, 2008. **336**(7650): p. 924-6.

- 1  
2  
3 440 42. Silagy, C.A., P. Middleton, and S. Hopewell, *Publishing protocols of systematic reviews: comparing what was done to what was planned*. Journal of the American Medical Association,  
4 441  
5 442 2002. **287**(21): p. 2831-4.  
6

7 443

8  
9 444  
10  
11  
12  
13  
14  
15  
16  
17  
18  
19  
20  
21  
22  
23  
24  
25  
26  
27  
28  
29  
30  
31  
32  
33  
34  
35  
36  
37  
38  
39  
40  
41  
42  
43  
44  
45  
46  
47  
48  
49  
50  
51  
52  
53  
54  
55  
56  
57  
58  
59  
60

1  
2  
3 445 **Figure Legends**  
4

5 446 **Figure 1. Mapping the demonstrated benefits and risks of sharing EHR with patients across the six**  
6 **domains of quality of care, as defined by the Institute of Medicine analytical framework.**  
7 447

8 448 Subgroup analysis will be performed by domain of quality of care domain and by time scale.  
9  
10  
11  
12  
13  
14  
15  
16  
17  
18  
19  
20  
21  
22  
23  
24  
25  
26  
27  
28  
29  
30  
31  
32  
33  
34  
35  
36  
37  
38  
39  
40  
41  
42  
43  
44  
45  
46  
47  
48  
49  
50  
51  
52  
53  
54  
55  
56  
57  
58  
59  
60

For peer review only

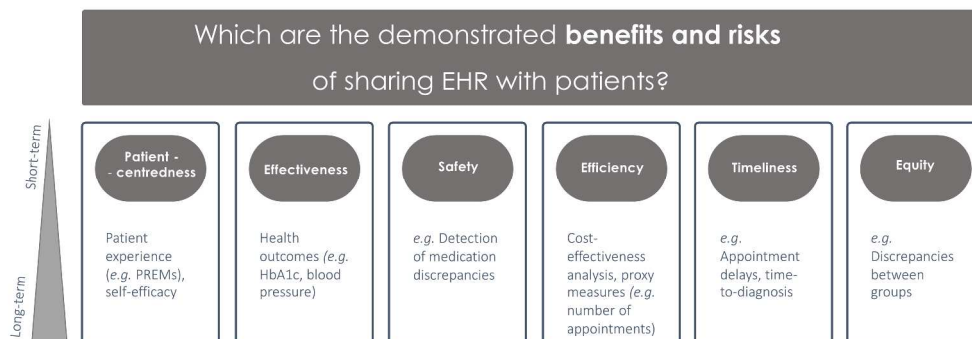

Figure 1. Mapping the demonstrated benefits and risks of sharing EHR with patients across the six domains of quality of care, as defined by the Institute of Medicine analytical framework. Subgroup analysis will be performed by domain of quality of care domain and by time scale.

326x170mm (300 x 300 DPI)

Review only

**PRISMA-P (Preferred Reporting Items for Systematic review and Meta-Analysis Protocols) 2015 checklist: recommended items to address in a systematic review protocol\***

| Section and topic                 | Item No | Checklist item                                                                                                                                                                                                                | Page           |
|-----------------------------------|---------|-------------------------------------------------------------------------------------------------------------------------------------------------------------------------------------------------------------------------------|----------------|
| <b>ADMINISTRATIVE INFORMATION</b> |         |                                                                                                                                                                                                                               |                |
| Title:                            |         |                                                                                                                                                                                                                               |                |
| Identification                    | 1a      | Identify the report as a protocol of a systematic review                                                                                                                                                                      | 1, 2,          |
| Update                            | 1b      | If the protocol is for an update of a previous systematic review, identify as such                                                                                                                                            | Not applicable |
| Registration                      | 2       | If registered, provide the name of the registry (such as PROSPERO) and registration number                                                                                                                                    | 2              |
| Authors:                          |         |                                                                                                                                                                                                                               |                |
| Contact                           | 3a      | Provide name, institutional affiliation, e-mail address of all protocol authors; provide physical mailing address of corresponding author                                                                                     | 1              |
| Contributions                     | 3b      | Describe contributions of protocol authors and identify the guarantor of the review                                                                                                                                           | 12             |
| Amendments                        | 4       | If the protocol represents an amendment of a previously completed or published protocol, identify as such and list changes; otherwise, state plan for documenting important protocol amendments                               | Not applicable |
| Support:                          |         |                                                                                                                                                                                                                               |                |
| Sources                           | 5a      | Indicate sources of financial or other support for the review                                                                                                                                                                 | 12             |
| Sponsor                           | 5b      | Provide name for the review funder and/or sponsor                                                                                                                                                                             | 12             |
| Role of sponsor or funder         | 5c      | Describe roles of funder(s), sponsor(s), and/or institution(s), if any, in developing the protocol                                                                                                                            | 12             |
| <b>INTRODUCTION</b>               |         |                                                                                                                                                                                                                               |                |
| Rationale                         | 6       | Describe the rationale for the review in the context of what is already known                                                                                                                                                 | 4-6            |
| Objectives                        | 7       | Provide an explicit statement of the question(s) the review will address with reference to participants, interventions, comparators, and outcomes (PICO)                                                                      | 7              |
| <b>METHODS</b>                    |         |                                                                                                                                                                                                                               |                |
| Eligibility criteria              | 8       | Specify the study characteristics (such as PICO, study design, setting, time frame) and report characteristics (such as years considered, language, publication status) to be used as criteria for eligibility for the review | 6,7,17         |
| Information sources               | 9       | Describe all intended information sources (such as electronic databases, contact with study authors, trial registers or other grey literature sources) with planned dates of coverage                                         | 6,7            |
| Search strategy                   | 10      | Present draft of search strategy to be used for at least one electronic database, including planned limits, such that it could be repeated                                                                                    | 6, 13-16       |

|                                    |     |                                                                                                                                                                                                                                                  |     |
|------------------------------------|-----|--------------------------------------------------------------------------------------------------------------------------------------------------------------------------------------------------------------------------------------------------|-----|
| Study records:                     |     |                                                                                                                                                                                                                                                  |     |
| Data management                    | 11a | Describe the mechanism(s) that will be used to manage records and data throughout the review                                                                                                                                                     | 6-9 |
| Selection process                  | 11b | State the process that will be used for selecting studies (such as two independent reviewers) through each phase of the review (that is, screening, eligibility and inclusion in meta-analysis)                                                  | 2,8 |
| Data collection process            | 11c | Describe planned method of extracting data from reports (such as piloting forms, done independently, in duplicate), any processes for obtaining and confirming data from investigators                                                           | 8   |
| Data items                         | 12  | List and define all variables for which data will be sought (such as PICO items, funding sources), any pre-planned data assumptions and simplifications                                                                                          | 7   |
| Outcomes and prioritization        | 13  | List and define all outcomes for which data will be sought, including prioritization of main and additional outcomes, with rationale                                                                                                             | 7   |
| Risk of bias in individual studies | 14  | Describe anticipated methods for assessing risk of bias of individual studies, including whether this will be done at the outcome or study level, or both; state how this information will be used in data synthesis                             | 8-9 |
| Data synthesis                     | 15a | Describe criteria under which study data will be quantitatively synthesised                                                                                                                                                                      | 8   |
|                                    | 15b | If data are appropriate for quantitative synthesis, describe planned summary measures, methods of handling data and methods of combining data from studies, including any planned exploration of consistency (such as $I^2$ , Kendall's $\tau$ ) | 8   |
|                                    | 15c | Describe any proposed additional analyses (such as sensitivity or subgroup analyses, meta-regression)                                                                                                                                            | 8   |
|                                    | 15d | If quantitative synthesis is not appropriate, describe the type of summary planned                                                                                                                                                               | 8   |
| Meta-bias(es)                      | 16  | Specify any planned assessment of meta-bias(es) (such as publication bias across studies, selective reporting within studies)                                                                                                                    | 8   |
| Confidence in cumulative evidence  | 17  | Describe how the strength of the body of evidence will be assessed (such as GRADE)                                                                                                                                                               | 8   |

**\* It is strongly recommended that this checklist be read in conjunction with the PRISMA-P Explanation and Elaboration (cite when available) for important clarification on the items. Amendments to a review protocol should be tracked and dated. The copyright for PRISMA-P (including checklist) is held by the PRISMA-P Group and is distributed under a Creative Commons Attribution Licence 4.0.**

*From: Shamseer L, Moher D, Clarke M, Ghersi D, Liberati A, Petticrew M, Shekelle P, Stewart L, PRISMA-P Group. Preferred reporting items for systematic review and meta-analysis protocols (PRISMA-P) 2015: elaboration and explanation. BMJ. 2015 Jan 2;349(jan02 1):g7647.*

# BMJ Open

## Impact of sharing electronic health records with patients on the quality and safety of care: a systematic review and narrative synthesis protocol

|                                 |                                                                                                                                                                                                                                                                                                                                                                                                                                                                                                                                                                                                                                                                                                                                                                      |
|---------------------------------|----------------------------------------------------------------------------------------------------------------------------------------------------------------------------------------------------------------------------------------------------------------------------------------------------------------------------------------------------------------------------------------------------------------------------------------------------------------------------------------------------------------------------------------------------------------------------------------------------------------------------------------------------------------------------------------------------------------------------------------------------------------------|
| Journal:                        | <i>BMJ Open</i>                                                                                                                                                                                                                                                                                                                                                                                                                                                                                                                                                                                                                                                                                                                                                      |
| Manuscript ID                   | bmjopen-2017-020387.R2                                                                                                                                                                                                                                                                                                                                                                                                                                                                                                                                                                                                                                                                                                                                               |
| Article Type:                   | Protocol                                                                                                                                                                                                                                                                                                                                                                                                                                                                                                                                                                                                                                                                                                                                                             |
| Date Submitted by the Author:   | 21-May-2018                                                                                                                                                                                                                                                                                                                                                                                                                                                                                                                                                                                                                                                                                                                                                          |
| Complete List of Authors:       | Neves, Ana Luisa; Imperial College London, Center for Health Policy, Institute of Global Health Innovation<br>Carter, Alexander; Imperial College London, Center for Health Policy, Institute of Global Health Innovation<br>Freise, Lisa; Imperial College London, Center for Health Policy, Institute of Global Health Innovation<br>Laranjo, Liliana; Macquarie University Faculty of Science, Australian Institute of Health Innovation; Universidade Nova de Lisboa, Centro de Investigação em Saúde Pública, Escola Nacional de Saúde Pública<br>Darzi, Ara; Imperial College London, Center for Health Policy, Institute of Global Health Innovation<br>Mayer, Erik; Imperial College London, Center for Health Policy, Institute of Global Health Innovation |
| <b>Primary Subject Heading</b>: | Health informatics                                                                                                                                                                                                                                                                                                                                                                                                                                                                                                                                                                                                                                                                                                                                                   |
| Secondary Subject Heading:      | Evidence based practice, Health policy                                                                                                                                                                                                                                                                                                                                                                                                                                                                                                                                                                                                                                                                                                                               |
| Keywords:                       | Health informatics < BIOTECHNOLOGY & BIOINFORMATICS, Information technology < BIOTECHNOLOGY & BIOINFORMATICS, Quality in health care < HEALTH SERVICES ADMINISTRATION & MANAGEMENT, Health policy < HEALTH SERVICES ADMINISTRATION & MANAGEMENT, Health & safety < HEALTH SERVICES ADMINISTRATION & MANAGEMENT                                                                                                                                                                                                                                                                                                                                                                                                                                                       |
|                                 |                                                                                                                                                                                                                                                                                                                                                                                                                                                                                                                                                                                                                                                                                                                                                                      |

SCHOLARONE™  
Manuscripts



1  
2  
3  
4 1 **Impact of sharing electronic health records with patients**  
5 2 **on the quality and safety of care:**  
6  
7 3 **a systematic review and narrative synthesis protocol**  
8  
9 4

10 5 **Authors:** Ana Luisa Neves<sup>1</sup> (ALN) - [ana.luisa.neves14@imperial.ac.uk](mailto:ana.luisa.neves14@imperial.ac.uk), Alexander Carter (AC)  
11 6 - [a.w.carter@imperial.ac.uk](mailto:a.w.carter@imperial.ac.uk), Lisa Freise<sup>1</sup> (LF) - [l.freise16@imperial.ac.uk](mailto:l.freise16@imperial.ac.uk), Liliana Laranjo<sup>2</sup> -  
12 7 [liliana.laranjo@mq.edu.au](mailto:liliana.laranjo@mq.edu.au), Ara Darzi<sup>1</sup> (AD) - [a.darzi@imperial.ac.uk](mailto:a.darzi@imperial.ac.uk), Erik Mayer<sup>1</sup> (EM) -  
13 8 [e.mayer@imperial.ac.uk](mailto:e.mayer@imperial.ac.uk)

14 9 <sup>1</sup>Center for Health Policy, Institute of Global Health Innovation, Imperial College London, London, UK  
15 10 <sup>2</sup>Australian Institute of Health Innovation, Centre for Health Informatics, Macquarie University, Sydney,  
16 11 Australia  
17  
18  
19  
20  
21  
22  
23  
24  
25  
26  
27  
28  
29  
30  
31  
32  
33  
34  
35  
36  
37  
38  
39

40 21 **Corresponding author**

41 22 Name: Ana Luisa Neves

42 23 Address: Centre for Health Policy, Room 1035/7, QEQM Wing, St Mary's Campus, London W2 1NY

43 24 E-mail: [ana.luisa.neves14@ic.ac.uk](mailto:ana.luisa.neves14@ic.ac.uk)

44 25 Telephone: 02033127259

45 26 Fax number: 02033126309  
46  
47  
48  
49  
50  
51

52 28 **Keywords [MeSH terms]:** Electronic Health Records, Patient Access to Records, Patient-Centered Care,  
53 29 Quality of Health Care, Patient Safety  
54

55 30 **Word count:** 2145 words  
56  
57  
58  
59  
60

1  
2  
3 **31 Abstract**  
4  
5  
6 **32**  
7  
8 **33** Introduction: Providing patients with access to Electronic Health Records (EHR) has emerged as a  
9 **34** promising solution to improve quality of care and safety. As the efforts to develop and implement EHR-  
10 **35** based data sharing platforms mature and scale up worldwide, there is a need to evaluate the impact of  
11 **36** these interventions and to weigh their relative risks and benefits, in order to inform evidence-based health  
12 **37** policies. The aim of this work is to systematically characterise and appraise the demonstrated benefits and  
13 **38** risks of sharing EHR with patients, by mapping them across the six domains of quality of care of the  
14 **39** Institute of Medicine (IOM) analytical framework (*i.e.* patient-centredness, effectiveness, efficiency,  
15 **40** timeliness, equity and safety).  
16  
17  
18  
19  
20  
21 **41**  
22  
23 **42** Methods and analysis: CINAHL, Cochrane, Embase, HMIC, Medline/PubMed and PsycINFO databases  
24 **43** will be searched from January 1997 to August 2017. Primary outcomes will include measures related with  
25 **44** the six domains of quality of care of the IOM analytical framework. The quality of the studies will be  
26 **45** assessed using the Cochrane Risk of Bias Tool, the ROBINS-I Tool and the Drummond's checklist. A  
27 **46** narrative synthesis will be conducted for all included studies. Subgroup analysis will be performed by  
28 **47** domain of quality of care domain and by time scale (*i.e.* short-, medium- or long-term impact). The body  
29 **48** of evidence will be summarised in a Summary of Findings table and its strength assessed according to the  
30 **49** GRADE criteria. This protocol was registered in PROSPERO (CRD42017070092).  
31  
32  
33  
34  
35  
36 **50**  
37  
38  
39 **51** Ethics and dissemination: This review does not require ethical approval as it will summarise published  
40 **52** studies with non-identifiable data. This protocol complies with the Preferred Reporting Items for  
41 **53** Systematic Review and Meta-Analysis Protocols (PRISMA-P) guidelines. Findings will be disseminated  
42 **54** widely through peer-reviewed publication and conference presentations, and patient partners will be  
43 **55** included in summarising the research findings into lay summaries and reports.  
44  
45  
46  
47 **56**  
48  
49 **57**  
50  
51 **58**  
52  
53  
54 **59**  
55  
56  
57  
58  
59  
60

60

**Strengths and limitations of this study**

- Comprehensive characterisation of interventions sharing EHR with patients
- Summary and appraisal of existing evidence on the potential benefits and risks of these interventions, grouped by domain of quality of care
- Map the contribution of these interventions in short-, medium- and long-term time frames, in order to customise informed decisions in health policies
- Expected limitations include the heterogenous nature of the outcomes assessed and the potentially reduced sample size in subgroup analyses, which may negatively impact the statistical power in data synthesis.

70

71

72

73

74

75

76

77

78

79

80

81

82

83

84

85

86

87

88

89

1  
2  
3 90  
45 91 **Introduction**

6  
7 92 Although, in England, patients have had the legal right to access their health records since 1998, access to  
8  
9 93 paper-based health records is mediated by health professionals and data controllers, through a  
10  
11 94 cumbersome procedural process [1]. Additionally, as health information is fragmented between different  
12  
13 95 organisations and levels of care, data access requests are often unable to provide a comprehensive health  
14  
15 96 history record [2, 3].

16 97 In the last decade, electronic health records (EHR), have emerged as a promising solution to enhance  
17  
18 98 patients' access to centralised medical information [4]. The adoption of EHR by primary care practices,  
19  
20 99 hospitals and other healthcare organizations has steadily increased in the last years. In England, the  
21  
22 100 percentage of General Practice surgeries that allowed patients to access their medical records online  
23  
24 101 increased from 3% to 97% between April 2014 and February 2016 [5]. Patients' willingness and ability to  
25  
26 102 access their health information through web portals is influenced by both individual (*i.e.* age, ethnicity,  
27  
28 103 education level, health literacy and health status) and by health care delivery factors (*i.e.* provider  
29  
30 104 endorsement and portal usability) [6, 7]. Various EHR-based platforms are currently used to share health  
31  
32 105 information with patients, including direct online access, with or without patient-provider communication  
33  
34 106 systems [8, 9] and health maintenance reminders [10, 11]. As these efforts mature and scale up  
35  
36 107 worldwide, there is a need to evaluate the impact of interventions sharing EHR with patients, in order to  
37  
38 108 weigh their relative risks and benefits and inform evidence-based health policies.

39 109 The Institute of Medicine (IOM) identified six domains of health care quality: patient-centredness,  
40  
41 110 effectiveness, efficiency, timeliness, equity and safety [12]. Patient-centredness ensures that the care  
42  
43 111 provided respects and responds to individual patient preferences, needs and values, thus incorporating  
44  
45 112 these in clinical decisions [12, 13]. Health care shall provide evidence-based services, which can be  
46  
47 113 ultimately expressed as improvements in health outcomes (*i.e.* effectiveness) [14], while ensuring patient  
48  
49 114 safety (*i.e.* prevention of errors and adverse effects associated with health care) [12]. Other aspects of  
50  
51 115 quality of delivery of care include the minimisation of the waste of human, physical or economical  
52  
53 116 resources (*i.e.* efficiency), the reduction of waits and harmful delays (*i.e.* timeliness) and the reduction of  
54  
55 117 avoidable differences on the delivery of care between different groups of health care users (*i.e.* equity)  
56  
57 118 [12, 15, 16].

58  
59 119 Providing patients with access to their health records has been linked to theorised benefits in four major  
60  
61 120 domains of health care quality: patient-centredness, effectiveness, safety and efficiency [17-19].  
62  
63 121 However, despite the growing body of evidence on the theorised benefits of sharing EHR with patients on

1  
2  
3 122 these domains, there is still a considerable gap between the predicted and demonstrated benefits of these  
4 123 interventions [20].

6  
7 124 In order to analyse the effect of providing patients access to their medical records on quality outcomes,  
8 125 Davis-Giardina T. *et al* performed a systematic review including studies published between 1970 and  
9 126 2012 [21]. According to this work, a limited amount of evidence suggests that access to medical records  
11 127 improves patient satisfaction and enhances patient-provider communication [21]. Similarly, a systematic  
13 128 review from de Lusignan *et al.* reported that providing patients online access to their EHR increased  
14 129 convenience and satisfaction [22]. These findings are in line with the model proposed by Otte-Trojel T. *et*  
15 130 *al*, according to which sharing EHR with patients can improve both patient-provider communication and  
16 131 patient satisfaction, by increasing continuity of care and patient convenience, respectively [23].

19  
20 132 Conversely, no clear benefits were found on effectiveness [21]. Until 2012, only a few studies evaluated  
21 133 the impact on effectiveness studies, most focusing on type 2 diabetes and with inconsistent results.  
22 134 Tenforde *et al* showed that providing access to medical records was associated with lower glycated  
23 135 haemoglobin A1c values [24]; however, no significant effect was found in three other studies assessing  
24 136 diabetes-specific effectiveness measures [25, 26]. One of the limitations of this review consists in the  
25 137 inclusion of studies evaluating the impact of sharing both electronic and paper-based health records - and  
26 138 this heterogeneity might mask potential specific benefits and risks of sharing EHR with patients.  
27 139 Furthermore, as pointed by the authors, the paucity of papers published up to that date resulted in a  
28 140 tendency to include small and methodologically less robust studies, thus increasing the risk of selective  
29 141 reporting and/or publication bias [21]. Mold F. *et al* also performed a systematic review assessing the  
30 142 impact of providing patients with access to their EHR; based in studies published between 1999 and 2012,  
31 143 this work found a positive influence in patient safety [27].

32  
33 144 However, the authors were unable to find a consistent beneficial effect on efficiency measures (*i.e.*  
34 145 number of face-to-face visits and telephone appointments) in both reviews [21, 27]. While some studies  
35 146 reported an increase in the number of face-to-face consultations [8, 28], others document a decrease [11,  
36 147 29, 30]. Similarly, inconsistent results were found regarding the impact on telephone consultations: only  
37 148 one study reported a decline in the total number [31], whilst six other studies reported either no change or  
38 149 an increase [9, 28-30, 32, 33]. It is important to note, however, that most of the included studies assessing  
39 150 efficiency measures included in this review showed a high risk of bias, mostly related to either unclear or  
40 151 absent blinding methods [27].

41  
42 152 The landmark reviews of Mold F. *et al* [27], Davis-Giardina T. *et al* [21], Ammenwerth E. *et al* [34] and  
43 153 Goldweig CL *et al* [7] provide a comprehensive characterisation of the literature published until 2013,  
44  
45  
46  
47  
48  
49  
50  
51  
52

1  
2  
3 154 highlighting the paucity and the scientific limitations of the evidence published until that date. Although  
4  
5 155 these reviews were unable to demonstrate clear benefits on efficiency and effectiveness measures, the  
6  
7 156 debates around patients' rights and data ownership in the digital era, and the need to improve patient-  
8  
9 157 centredness of health care delivery have acted as strong drivers to allocate resources to interventions and  
10  
11 158 platforms aiming to share EHR with patients. As consequence of these efforts, it is plausible that studies  
12  
13 159 performed in the last 5 years can provide further clarification for this evidence gap.

14  
15 160 Furthermore, systematic reviews performed to the date do not address all domains of quality of care; in  
16  
17 161 particular, the impact of sharing EHR with patients on timeliness or equity has not been addressed [7, 21,  
18  
19 162 27, 34, 35]. This is a particularly relevant gap in knowledge, given that interventions aimed at improving  
20  
21 163 the quality of care do not necessarily improve all specific domains, and may even have a deleterious  
22  
23 164 effect in some of them.

24  
25 165 This review will expand on the above-mentioned work, in order to identify recent methodological and  
26  
27 166 scientific progress until June 2017. Following the PRISMA-P checklist as guidance [36], we propose a  
28  
29 167 systematic and reproducible strategy to query the literature on the demonstrated benefits and risks of  
30  
31 168 sharing EHR with patients and map these results in a comprehensive framework of health care quality  
32  
33 169 measures.

34  
35 170

### 36 37 171 **Research aims**

38  
39 172 The main objectives of this review are: 1) to systematically characterise interventions sharing EHR with  
40  
41 173 patients; and 2) to assess the demonstrated risks and benefits of these interventions on patient-  
42  
43 174 centredness, effectiveness, safety, efficiency, timeliness and equity, compared to usual care (no  
44  
45 175 intervention). As secondary aim, we will map the contribution of these interventions in short-, medium-  
46  
47 176 and long-term timeframes (Figure 1).

48  
49 177

### 50 51 178 **Methods and analysis**

#### 52 53 179 *Search strategy*

54  
55 180 The search strategy will be performed using resources that enhance methodological transparency and  
56  
57 181 improve the reproducibility of the results and evidence synthesis. A search of the literature from the last  
58  
59 182 20 years (January 1997 – August 2017) will be performed on CINAHL, Cochrane, Embase, HMIC,  
60  
183 Medline/PubMed and PsycINFO. Search strings (Table 1) will combine free terms and controlled

1  
2  
3 184 vocabulary, whenever supported. We will also search grey literature sources, including registrations in the  
4 185 International Prospective Register of Systematic Reviews (PROSPERO), reports of relevant stakeholder  
5 186 organisations (NHS Digital, AMIA, eHealth at WHO, International Society for Telemedicine and  
6 187 eHealth), and conference proceedings (last 5 years) of several related conferences (American Medical  
7 188 Informatics Association [AMIA], MedInfo, Medicine 2.0, Medicine X), in order to identify possible  
8 189 additional studies that meet the inclusion criteria. Language restrictions will be applied and only articles  
9 190 in English will be included.  
10  
11  
12  
13  
14

15 191

### 17 192 *Study selection criteria*

19 193 A summary of the participants, interventions, comparators and outcomes (PICO) considered, as well as  
20 194 the type of studies included, is provided in Table 2.

23 195 The systematic review will focus on studies on adult subjects, including both patients and carers (mean  
24 196 age of study sample  $\geq 16$  years). The systematic review does not focus on a particular disease area or  
25 197 health system setting as it intends to comprehensively characterise the scope of interventions sharing EHR  
26 198 with patients.  
27  
28  
29

30 199 Studies assessing the impact of sharing EHR with patients, either isolated or as part of a multicomponent  
31 200 intervention, will be included. Included interventions will comprise: 1) web-based patient access to EHR;  
32 201 2) EHR-based health reminders / messaging or 3) online patient-provider communication systems (health  
33 202 information exchange platforms). Studies focusing on health reminders only (not EHR-based) or  
34 203 appointment reminders will not be considered. The comparator will be 'no intervention' (e.g. usual care).  
35  
36  
37  
38

39 204 Primary outcomes will include any measure related to a) patient-centredness (e.g. patient-reported  
40 205 experience measures (PREMs), b) effectiveness (e.g. health outcomes); c) patient safety (e.g.  
41 206 identification of medication discrepancies); d) efficiency (e.g. economic evaluation measures and proxies;  
42 207 including service costs, number of consultations/admissions, e) timeliness (e.g. waiting lists, time-to-  
43 208 treatment) and f) equity (e.g. discrepancies in quality measures between different groups of patients)  
44 209 (Figure 1). Studies that only report cognitive outcomes (e.g. intent), motivational outcomes or other  
45 210 subjective psychological measures will be excluded. The types of study considered in this systematic  
46 211 review will be a) randomised controlled trials; b) cluster randomised trials; c) quasi-experimental studies;  
47 212 d) case-control studies, e) cohort studies and f) cost-effectiveness studies. The reference lists of  
48 213 systematic reviews identified in this search will also be screened to ensure all eligible studies are  
49 214 captured.  
50  
51  
52  
53  
54  
55  
56  
57  
58  
59  
60



1  
2  
3 215 *Screening and data extraction*  
4

5 216 Quantitative studies will be independently assessed by three reviewers and reported using the Preferred  
6 217 Reporting Items for Systematic Reviews and Meta-Analyses (PRISMA-P) flow diagram [36]. Initial  
7 218 screening of studies will be based on the information contained in their titles and abstracts and will be  
8 219 conducted by two independent investigators. Full-paper screening will be conducted by the same  
9 220 independent investigators. Cohen's kappa will be used to measure inter-coder agreement in each  
10 221 screening phase. When there are doubts regarding inclusion or exclusion, a third investigator will be  
11 222 involved in the decision. Two independent investigators will extract information from the included  
12 223 studies into a standardized form. The data collected for each study will include: name of the first author,  
13 224 year of publication, technology, intervention components and characteristics, study duration, participants'  
14 225 and setting characteristics, outcomes and retention rates. Two investigators will review the abstraction  
15 226 form for consistency. Disagreements will be resolved by a third investigator.  
16  
17  
18  
19  
20  
21  
22  
23  
24

25 227  
26 228 *Quality assessment*  
27

28 229 The quality of randomised controlled trials and cluster randomized trials will be assessed using the  
29 230 Cochrane Risk of Bias Tool [37], that assesses the following study-level aspects: a) randomisation  
30 231 sequence allocation; b) allocation concealment; c) blinding; d) completeness of outcome data and e)  
31 232 selective outcome reporting. The quality of non-randomised intervention studies (*i.e.* case control, cohort,  
32 233 quasi-experimental) will be appraised using the ROBINS-I tool, which assesses bias due to a)  
33 234 confounding, b) selection of participants, c) classification of interventions, d) deviations from intended  
34 235 interventions, e) missing data, f) measurement of outcomes and g) selection of reported results [38]. For  
35 236 cost-effectiveness studies, the Drummond's checklist for assessing economic evaluations will be used  
36 237 [39]. Two independent reviewers will score the selected studies and disagreements will be resolved by a  
37 238 third person.  
38  
39  
40  
41  
42  
43

44 239 The risk of bias for each outcome across individual studies will be summarised as a narrative statement,  
45 240 and supported by a risk of bias table. A review-level narrative summary of the risk of bias will also be  
46 241 provided.  
47  
48  
49

50 242

51 243

52 244  
53  
54  
55  
56  
57  
58  
59  
60



1  
2  
3 245 *Descriptive analysis and meta-analysis*  
4

5 246 Planned subgroup analysis will be performed by domain of quality of care (IOM framework) and by time  
6 247 scale (*i.e.* short-, medium- or long-term impact). For studies with a high or unclear risk of bias, defined as  
7 248 high or unclear risk in 50% or more of the quality assessment outcomes, a narrative description of the risk  
8 249 of bias will be provided. Risk of bias assessments will be incorporated into synthesis by performing  
9 250 sensitivity analysis (*i.e.* limiting to studies at lowest risk of bias in a secondary analysis). Depending on  
10 251 the amount of information retrieved, subgroup analysis will also be performed for specific diseases.

11 252 A narrative synthesis will be conducted for all the included studies. Parallel-group trials that are deemed  
12 253 comparable in relevant ways will be pooled together for a summary effect. Whenever possible,  
13 254 continuous and dichotomous outcomes will be pooled together for meta-analysis purposes. All effect sizes  
14 255 will be transformed into a common metric, in order to make them comparable across studies — the bias-  
15 256 corrected standardized difference in means (Hedges'  $g$ ) — classified as positive when in favor of the  
16 257 intervention and negative when in favor of the control. Heterogeneity will be assessed using  $I^2$ . The  
17 258 presence of publication bias will be evaluated by use of a funnel plot and the Duval and Tweedie's trim  
18 259 and fill method [40].

19 260 The body of evidence will be summarised in a Summary of Findings table and the strength of the body of  
20 261 evidence will be assessed according to GRADE criteria [41].  
21  
22 262

23 263 *Patient and public involvement*  
24  
25  
26  
27  
28

29 264 Our research question emerged from the implementation evaluation of the Care Information Exchange  
30 265 (CIE), a pilot web portal/patient-controlled EHR happening across a 2.4 million population in North West  
31 266 London. CIE implementation evaluation was shaped by its steering group, which included lay partners,  
32 267 and their perspectives reinforced that our research question was relevant and aligned with  
33 268 patients' interest.

34 269 Patients were not directly involved in the design of this study. As this is a protocol for a systematic  
35 270 review and no participant recruitment will take place, their involvement on the recruitment and  
36 271 dissemination of findings to participants was not applicable.

37 272 However, patient partners will be included in the interpretation of our results, in the co-development of a  
38 273 dissemination strategy, and in summarising the research findings into lay summaries and reports, in order  
39 274 to raise awareness and stimulate public participation on this topic.  
40  
41  
42  
43  
44  
45  
46  
47  
48  
49  
50  
51  
52  
53  
54  
55  
56  
57  
58  
59  
60

1  
2  
3 276 *Amendments*  
4

5 277 Any amendments to this protocol will be documented with reference to saved searches and analysis  
6  
7 278 methods, which will be recorded in bibliographic databases (Ovid), Endnote, and Excel templates for data  
8  
9 279 collection and synthesis.  
10

11 280  
12  
13  
14  
15  
16  
17  
18  
19  
20  
21  
22  
23  
24  
25  
26  
27  
28  
29  
30  
31  
32  
33  
34  
35  
36  
37  
38  
39  
40  
41  
42  
43  
44  
45  
46  
47  
48  
49  
50  
51  
52  
53  
54  
55  
56  
57  
58  
59  
60

## 281 Discussion

282 As the implementation of interventions to share EHR with patients scales up worldwide, the systematic  
283 evaluation of their impact emerges as a priority research topic.

284 One of the strengths of the proposed study is to apply a reproducible and transparent procedure for  
285 systematic review of the literature. In this protocol, we clearly describe the types of studies, participants,  
286 interventions, and outcomes that will be included, as well as the data sources, search strategy, data  
287 extraction methods (including quality assessment) and methods of combining data [42]. By publishing the  
288 research protocol, we reinforce the clarity of the strategy and minimise the risk of bias, namely selective  
289 outcome reporting [37]. Second, we will focus solely on the impact of EHR-based studies, increasing the  
290 sensitivity to detect specific benefits of this type of intervention. Third, for the first time, we aim to  
291 comprehensively evaluate both the benefits and risks of these interventions in a wide range of domains of  
292 quality of care, as defined by the IOM, and in diverse time frames. This results shall provide high-level  
293 information to inform, support and customise decisions in health policies.

294 Potential limitations of this study include the heterogeneity of measures and outcomes evaluated and the  
295 potentially reduced number of studies in subgroup analyses, which may negatively influence the statistical  
296 power in data synthesis.

297

298

299

300

301

302

303

304

305

306

307

308

309

310

## 311 **Acknowledgements**

312 We thank Jacqueline Cousins (Library Manager and Liaison Librarian at Imperial College London) for  
313 the support improving the composition of the search terms and procedural aspects of the search strategy.  
314 We would also like to acknowledge Dr Søren Rud Kristensen (Senior Lecturer in Health Economics at the  
315 Centre for Health Policy at the Institute of Global Health Innovation) and Dr Joachim Marti (Senior  
316 Lecturer in Health Economics at the Centre for Health Policy at the Institute of Global Health Innovation)  
317 for their advices regarding the quality appraisal of cost-effectiveness studies, and Miss Anna Lawrence-  
318 Jones (Patient and Public Involvement and Engagement Manager at Imperial National Institute for Health  
319 Research (NIHR) Patient Safety Translation Research Centre) for the useful discussions around public  
320 and patient involvement.

## 322 **Ethics and dissemination**

323 This review does not require ethical approval as it will summarise published studies with non-identifiable  
324 data. This protocol complies with the PRISMA-P guidelines. Findings will be disseminated widely  
325 through peer-reviewed publication and conference presentations. Patient partners will be included in the  
326 co-development of our dissemination strategy, and in summarising the research findings into lay  
327 summaries and reports.

## 329 **Authors' contributions**

330 ALN, AC and EKM conceptualised this research. ALN, AC and LL designed the protocol. ALN and LF  
331 defined the concepts and search items. EKM and AD contributed to the conceptualisation and commented  
332 on the multiple versions of the protocol. The manuscript was written by ALN with contributions from all  
333 authors.

## 335 **Funding statement**

336 This work is supported by the Sowerby Program and by the National Institute for Health Research  
337 (NIHR) Patient Safety Translation Research Centre. The views of the authors do not necessarily reflect  
338 those of the NHS, NIHR or the Department of Health.

## 340 **Competing interests' statement**

1  
2  
3 341 We declare no conflict(s) of interest associated with this research.  
4  
5  
6 342

7  
8 343 **Data sharing statement**

9  
10 344 No additional data relevant to this protocol are available for distribution. All relevant data and search  
11 345 terms are published in this manuscript.  
12  
13  
14 346

15  
16  
17  
18  
19  
20  
21  
22  
23  
24  
25  
26  
27  
28  
29  
30  
31  
32  
33  
34  
35  
36  
37  
38  
39  
40  
41  
42  
43  
44  
45  
46  
47  
48  
49  
50  
51  
52  
53  
54  
55  
56  
57  
58  
59  
60

For peer review only

347 **Table 1. Concepts and search items**

| Database                                                                                                                                                                | Search items                                                                                                                                                                                                                                                                                                                                                                                                                                                                                                                                                                                                                                                                                                                                                                                                                                                                                                                                                                                                                                                                                                                                                                                                           |
|-------------------------------------------------------------------------------------------------------------------------------------------------------------------------|------------------------------------------------------------------------------------------------------------------------------------------------------------------------------------------------------------------------------------------------------------------------------------------------------------------------------------------------------------------------------------------------------------------------------------------------------------------------------------------------------------------------------------------------------------------------------------------------------------------------------------------------------------------------------------------------------------------------------------------------------------------------------------------------------------------------------------------------------------------------------------------------------------------------------------------------------------------------------------------------------------------------------------------------------------------------------------------------------------------------------------------------------------------------------------------------------------------------|
| <b>CINAHL via EBSCO</b>                                                                                                                                                 | <ol style="list-style-type: none"> <li>1. (((electronic* or online or on-line or digital*) N1 (health record* or medical record* or personal record* or patient record*)) or EHR# or EMR# or ephr#)</li> <li>2. ((information or data) N4 (shar* or exchange*)) or HIE or HIEs or access*)</li> <li>3. #1 and #2</li> <li>4. (((experience or satisfaction) N4 (patient* or consumer* or client* or survey or questionnaire*)) or PREM* or patient-reported experience measure*)</li> <li>5.(effectiveness or health outcome*)</li> <li>6. (patient N1 (safety or harm)) or safety manag* or accident prevent* or error* or medication reconcil* or near miss*</li> <li>7. (efficiency or economic* or cost* or expenditure* or charge* or fee*1 or (number N1 appointment*) or (number adj2 admission*) or (number N1 telephone visit*))</li> <li>8. waiting lists or timeliness or time-to-treatment</li> <li>9. health equity</li> <li>10. #4 or #5 or #6 or #7 or #8 or #9</li> <li>13. 3 and 10</li> </ol>                                                                                                                                                                                                        |
| <b>Cochrane via url:</b><br><a href="http://onlinelibrary.wiley.com/cochranelibrary/search/advanced">http://onlinelibrary.wiley.com/cochranelibrary/search/advanced</a> | <ol style="list-style-type: none"> <li>1. (((electronic* or online or on-line or digital*) near/1 (health record* or medical record* or personal record* or patient record*)) or EHR or EHRs or EMR or EMRs or ephr or ephrs)</li> <li>2. Electronic Health Records [MesH]</li> <li>3. #1 or #2</li> <li>4. (((information or data) near/4 (shar* or exchange*)) or HIE or HIES or access*)</li> <li>5. Information Dissemination [MesH]</li> <li>6. #4 or #5</li> <li>7. #3 and #6</li> <li>8. (((experience or satisfaction) near/4 (patient* or consumer* or client* or survey or questionnaire*)) or PREM* or patient-reported experience measure*)</li> <li>9. (effectiveness or health outcome*)</li> <li>10. (patient near/1 safety) or (patient near/1 harm) or safety manag* or accident prevent* or error* or medication reconcil*</li> <li>11. (efficiency or economic* or cost* or expenditure* or charge* or fee* or (number near/1 appointment*) or (number near/1 admission*) or (number near/1 telephone visit*))</li> <li>12. time-to-treatment or timeliness</li> <li>13. waiting lists [MesH]</li> <li>14. health equity [MesH]</li> <li>15. #8 or #9 or #10 or #11 or #12 or #13 or #14</li> </ol> |

|                                                                                                                                                                                                                                                  |                                                                                                                                                                                                                                                                                                                                                                                                                                                                                                                                                                                                                                                                                                                                                                                                                                                                                                                                                                                                                                                                                |
|--------------------------------------------------------------------------------------------------------------------------------------------------------------------------------------------------------------------------------------------------|--------------------------------------------------------------------------------------------------------------------------------------------------------------------------------------------------------------------------------------------------------------------------------------------------------------------------------------------------------------------------------------------------------------------------------------------------------------------------------------------------------------------------------------------------------------------------------------------------------------------------------------------------------------------------------------------------------------------------------------------------------------------------------------------------------------------------------------------------------------------------------------------------------------------------------------------------------------------------------------------------------------------------------------------------------------------------------|
| <p>1<br/>2<br/>3<br/>4<br/>5<br/>6<br/>7<br/>8<br/>9<br/>10<br/>11<br/>12<br/>13<br/>14<br/>15<br/>16<br/>17<br/>18<br/>19<br/>20<br/>21<br/>22<br/>23<br/>24<br/>25<br/>26<br/>27<br/>28<br/>29<br/>30<br/>31</p> <p><b>Embase via Ovid</b></p> | <p>17. 7 and 15</p> <p>1. (((electronic* or online or on-line or digital*) adj2 (health record* or medical record* or personal record* or patient record*)) or EHR? or EMR? or ephr?)</p> <p>2. Electronic health record/</p> <p>3. 1 or 2</p> <p>4. (((information or data) adj5 (shar* or exchang*)) or HIE*2 or access*)</p> <p>5. Information dissemination/</p> <p>6. 4 or 5</p> <p>7. 3 and 6</p> <p>8. (((experience or satisfaction) adj5 (patient* or consumer* or client* or survey or questionnaire*)) or PREM* or patient-reported experience measure*)</p> <p>9. (effectiveness or health outcome*) 10. (patient adj2 (safety or harm)) or safety manag* or accident prevent* or error* or medication reconcil* or near miss*</p> <p>11. (efficiency or economic* or cost* or expenditure* or charge* or fee*1 or (number adj2 appointment*) or (number adj2 admission*) or (number adj2 telephone visit*))</p> <p>12. waiting list* or time to treatment/ or timeliness</p> <p>13. health equity/</p> <p>14. 8 or 9 or 10 11 or 12 or 13</p> <p>15. 7 and 14</p> |
| <p>32<br/>33<br/>34<br/>35<br/>36<br/>37<br/>38<br/>39<br/>40<br/>41<br/>42<br/>43<br/>44<br/>45<br/>46<br/>47<br/>48<br/>49<br/>50<br/>51<br/>52<br/>53<br/>54<br/>55<br/>56<br/>57<br/>58<br/>59<br/>60</p> <p><b>HMIC via Ovid</b></p>        | <p>1. (((electronic* or online or on-line or digital*) adj2 (health record* or medical record* or personal record* or patient record*)) or EHR? or EMR? or ephr?)</p> <p>2. Electronic patient records/</p> <p>3. 1 or 2</p> <p>4. (((information or data) adj5 (shar* or exchang*)) or HIE*2 or access*)</p> <p>5. Information exchange/</p> <p>6. 4 or 5</p> <p>7. 3 and 6</p> <p>8. (((experience or satisfaction) adj5 (patient* or consumer* or client* or survey or questionnaire*)) or PREM* or patient-reported experience measure*)</p> <p>9. (effectiveness or health outcome*) 10. (patient adj2 (safety or harm)) or safety manag* or accident prevent* or error* or medication reconcil* or near miss*</p> <p>11. (efficiency or economic* or cost* or expenditure* or charge* or fee*1 or (number adj2 appointment*) or (number adj2 admission*) or (number adj2 telephone visit*))</p> <p>12. waiting lists/ or patient waiting time or timeliness</p> <p>13. health inequalities/ or equity</p>                                                                |

|                          |                                                                                                                                                                                                                                                                                                                                                                                                                                                                                                                                                                                                                                                                                                                                                                                                                                                                                                                                                                                                       |
|--------------------------|-------------------------------------------------------------------------------------------------------------------------------------------------------------------------------------------------------------------------------------------------------------------------------------------------------------------------------------------------------------------------------------------------------------------------------------------------------------------------------------------------------------------------------------------------------------------------------------------------------------------------------------------------------------------------------------------------------------------------------------------------------------------------------------------------------------------------------------------------------------------------------------------------------------------------------------------------------------------------------------------------------|
|                          | 14. 8 or 9 or 10 or 11 or 12 or 13<br>15. 7 and 14                                                                                                                                                                                                                                                                                                                                                                                                                                                                                                                                                                                                                                                                                                                                                                                                                                                                                                                                                    |
| <b>Medline via Ovid</b>  | 1. (((electronic* or online or on-line or digital*) adj2 (health record* or medical record* or personal record* or patient record*)) or EHR? or EMR? or ephr?)<br>2. Electronic Health Records/<br>3. 1 or 2<br>4. (((information or data) adj5 (shar* or exchang*)) or HIE*2 or access*<br>5. Information Dissemination/<br>6. 4 or 5<br>7. 3 and 6<br>8. (((experience or satisfaction) adj5 (patient* or consumer* or client* or survey or questionnaire*)) or PREM* or patient-reported experience measure*)<br>9. (effectiveness or health outcome*)<br>10. ((patient adj2 (safety or harm)) or safety manag* or accident prevent* or error* or medication reconcil* or near miss*)<br>11. (efficiency or economic* or cost* or expenditure* or charge* or fee*1 or (number adj2 appointment*) or (number adj2 admission*) or (number adj2 telephone visit*))<br>12. Waiting Lists/ or Time-to-treatment/ or timeliness<br>13. Health Equity/<br>14. 8 or 9 or 10 or 11 or 12 or 13 15. 7 and 14 |
| <b>PsycINFO via Ovid</b> | 1. (((electronic* or online or on-line or digital*) adj2 (health record* or medical record* or personal record* or patient record*)) or EHR? or EMR? or ephr?)<br>2. (((information or data) adj5 (shar* or exchang*)) or HIE*2 or access*<br>3. 1 and 2<br>4. (((experience or satisfaction) adj5 (patient* or consumer* or client* or survey or questionnaire*)) or PREM* or patient-reported experience measure*)<br>5. (effectiveness or health outcome*)<br>6. (patient adj2 (safety or harm)) or safety manag* or accident prevent* or error* or medication reconcil* or near miss*<br>7. (efficiency or economic* or cost* or expenditure* or charge* or fee*1 or (number adj2 appointment*) or (number adj2 admission*) or (number adj2 telephone visit*))<br>8. waiting list* or time-to-treatment or timeliness<br>9. equity or health disparities/<br>10. 4 or 5 or 6 or 7 or 8 or 9<br>11. 3 and 10                                                                                       |

348 Search themes (facets) and terms derived for each theme relating to the use of EHR and predicted benefits  
349 (patient experience, effectiveness and efficiency)



**Table 2. Inclusion and exclusion criteria**

|                     | <b>Inclusion criteria</b>                                                                                                                                                                                                                                                                                                                                                                                                                              | <b>Exclusion criteria</b>                                                                                                         |
|---------------------|--------------------------------------------------------------------------------------------------------------------------------------------------------------------------------------------------------------------------------------------------------------------------------------------------------------------------------------------------------------------------------------------------------------------------------------------------------|-----------------------------------------------------------------------------------------------------------------------------------|
| <b>Population</b>   | Adult subjects (patients and carers)                                                                                                                                                                                                                                                                                                                                                                                                                   | Individuals 16 years of age and under (e.g. mean age of study sample <16)                                                         |
| <b>Intervention</b> | Electronic health record-based interventions, including: <ul style="list-style-type: none"> <li>• Patient access to EHR</li> <li>• EHR-based reminders / messaging</li> <li>• Unidirectional or bidirectional online patient-provider communication systems (care information exchange platforms);</li> </ul>                                                                                                                                          | <ul style="list-style-type: none"> <li>• Health reminders only</li> </ul>                                                         |
| <b>Comparison</b>   | No intervention (e.g. usual care)                                                                                                                                                                                                                                                                                                                                                                                                                      |                                                                                                                                   |
| <b>Outcome</b>      | Any measure related to a) patient-centredness (e.g. PREMs), b) effectiveness (e.g. health outcomes); c) patient safety (e.g. identification of medication discrepancies); d) efficiency (e.g. economic evaluation measures and proxies; including service costs, number of consultations/admissions, e) timeliness (e.g. waiting lists, time-to-treatment) or f) equity (e.g. discrepancies in quality measures between different groups of patients). | Studies that only report cognitive outcomes (e.g. intention to), motivational outcomes or other subjective psychological measures |
| <b>Study type</b>   | Randomised controlled trials, cluster randomised trials, quasi-experimental, case-control, cohort studies, cost-effectiveness                                                                                                                                                                                                                                                                                                                          |                                                                                                                                   |

350

351

352 **Reference**

- 353 1. Dimond, B., *Rights to information access under the Data Protection Act*. British Journal of  
354 Nursing, 2005. **14**(14): p. 774-6.
- 355 2. Stange, K.C., *The problem of fragmentation and the need for integrative solutions*. Annals of  
356 Family Medicine, 2009. **7**(2): p. 100-3.
- 357 3. Roukema, J., et al., *Paper versus computer: feasibility of an electronic medical record in general  
358 pediatrics*. Pediatrics, 2006. **117**(1): p. 15-21.
- 359 4. Vest, J.R., *Health information exchange: national and international approaches*. Advances in  
360 Health Care Management, 2012. **12**: p. 3-24.
- 361 5. Houses of Parliament, *EHR House of Parliament Report*. 2016.
- 362 6. Irizarry, T., A. DeVito Dabbs, and C.R. Curran, *Patient Portals and Patient Engagement: A State of  
363 the Science Review*. Journal of Medical Internet Research, 2015. **17**(6): p. e148.
- 364 7. Goldzweig, C.L., et al., *Electronic patient portals: evidence on health outcomes, satisfaction,  
365 efficiency, and attitudes: a systematic review*. Annals of Internal Medicine, 2013. **159**(10): p.  
366 677-87.
- 367 8. Delbanco, T., et al., *Inviting patients to read their doctors' notes: a quasi-experimental study and  
368 a look ahead*. Annals of Internal Medicine, 2012. **157**(7): p. 461-70.
- 369 9. Katz, S.J., N. Nissan, and C.A. Moyer, *Crossing the digital divide: evaluating online  
370 communication between patients and their providers*. The American Journal of Managed Care,  
371 2004. **10**(9): p. 593-8.
- 372 10. Wright, A., et al., *Randomized controlled trial of health maintenance reminders provided directly  
373 to patients through an electronic PHR*. Journal of General Internal Medicine, 2012. **27**(1): p. 85-  
374 92.
- 375 11. Nagykaldi, Z., et al., *Impact of a Wellness Portal on the delivery of patient-centered preventive  
376 care*. Journal of the American Board of Family Medicine, 2012. **25**(2): p. 158-67.
- 377 12. America, I.o.M.C.o.Q.o.H.C.i., *Crossing the Quality Chasm: A New Health System for the 21st  
378 Century*. 2001, Washington (DC): National Academies Press.
- 379 13. Scholl, I., et al., *An integrative model of patient-centeredness - a systematic review and concept  
380 analysis*. PloS One, 2014. **9**(9): p. e107828.
- 381 14. Arah, O.A., et al., *Conceptual frameworks for health systems performance: a quest for  
382 effectiveness, quality, and improvement*. Journal of the International Society for Quality in  
383 Health Care, 2003. **15**(5): p. 377-98.
- 384 15. Hussey, P.S., et al., *A systematic review of health care efficiency measures*. Health services  
385 Research, 2009. **44**(3): p. 784-805.
- 386 16. World Health Organisation, *Health Systems: Equity, 2017*. Available at  
387 <http://www.who.int/healthsystems/topics/equity/en/>. Last access: 26<sup>th</sup> March 2018.
- 388 17. Wagner, K.A., F.W. Lee, and J.P. Glaser, *Healthcare information systems: A practical approach  
389 for health care management.*, J.W. Sons. 2013.
- 390 18. Department of Health, *The power of information: giving people control of the health and care  
391 information they need*, 2012. Available at: [https://www.gov.uk/government/publications/giving-  
392 people-control-of-the-health-and-care-information-they-need](https://www.gov.uk/government/publications/giving-people-control-of-the-health-and-care-information-they-need). Last access: 26<sup>th</sup> March 2018.
- 393 19. Ross, S.E. and C.-T. Lin, *The effects of promoting patient access to medical records: a review*.  
394 Journal of the American Medical Informatics Association, 2003. **10**(2): p. 129-38.
- 395 20. Jilka, S.R., et al., *"Nothing About Me Without Me": An Interpretative Review of Patient Accessible  
396 Electronic Health Records*. Journal of Medical Internet Research, 2015. **17**(6): p. e161.

- 1  
2  
3 397 21. Davis Giardina, T., et al., *Patient access to medical records and healthcare outcomes: a*  
4 398 *systematic review*. Journal of the American Medical Informatics Association, 2014. **21**(4): p. 737-  
5 399 41.
- 6 400 22. de Lusignan, S., et al., *Patients' online access to their electronic health records and linked online*  
7 401 *services: a systematic interpretative review*. BMJ Open, 2014. **4**(9): p. e006021.
- 8 402 23. Otte-Trojel, T., et al., *How outcomes are achieved through patient portals: a realist review*.  
9 403 Journal of the American Medical Informatics Association, 2014. **21**(4): p. 751-7.
- 10 404 24. Tenforde, M., et al., *The association between personal health record use and diabetes quality*  
11 405 *measures*. Journal of General Internal Medicine, 2012. **27**(4): p. 420-4.
- 12 406 25. McCarrier, K.P., et al., *Web-based collaborative care for type 1 diabetes: a pilot randomized trial*.  
13 407 Diabetes Technology & Therapeutics, 2009. **11**(4): p. 211-7.
- 14 408 26. Grant, R.W., et al., *Practice-linked online personal health records for type 2 diabetes mellitus: a*  
15 409 *randomized controlled trial*. Archives of Internal Medicine, 2008. **168**(16): p. 1776-82.
- 16 410 27. Mold, F., et al., *Patients' online access to their electronic health records and linked online*  
17 411 *services: a systematic review in primary care*. The British Journal of General Practice, 2015.  
18 412 **65**(632): p. e141-51.
- 19 413 28. Palen, T.E., et al., *Association of online patient access to clinicians and medical records with use*  
20 414 *of clinical services*. Journal of the American Medical Association, 2012. **308**(19): p. 2012-9.
- 21 415 29. Bergmo, T.S., et al., *Electronic patient-provider communication: will it offset office visits and*  
22 416 *telephone consultations in primary care?* International Journal of Medical Informatics, 2005.  
23 417 **74**(9): p. 705-10.
- 24 418 30. Zhou, Y.Y., et al., *Patient access to an electronic health record with secure messaging: impact on*  
25 419 *primary care utilization*. The American Journal of Managed Care, 2007. **13**(7): p. 418-24.
- 26 420 31. Kummervold, P.E., et al., *[Patient-physician interaction over the internet]*. Tidsskr Nor  
27 421 Laegeforen. 2004 Oct 21;124(20):2633-6.
- 28 422 32. Lin, C.-T., et al., *An Internet-based patient-provider communication system: randomized*  
29 423 *controlled trial*. Journal of Medical Internet Research, 2005. **7**(4): p. e47.
- 30 424 33. Katz, S.J., et al., *Effect of a triage-based E-mail system on clinic resource use and patient and*  
31 425 *physician satisfaction in primary care: a randomized controlled trial*. Journal of General Internal  
32 426 Medicine, 2003. **18**(9): p. 736-44.
- 33 427 34. Ammenwerth, E., P. Schnell-Inderst, and A. Hoerbst, *The impact of electronic patient portals on*  
34 428 *patient care: a systematic review of controlled trials*. Journal of Medical Internet research, 2012.  
35 429 **14**(6): p. e162.
- 36 430 35. Ammenwerth, E., et al., *Adult patient access to electronic health records (Protocol)*. Cochrane  
37 431 Database of Systematic Reviews 2017(6): p. CD012707.
- 38 432 36. Moher, D., et al., *Preferred reporting items for systematic review and meta-analysis protocols*  
39 433 *(PRISMA-P) 2015 statement*. Systematic Reviews, 2015. **4**: p. 1.
- 40 434 37. Higgins, J. and S. Green, *Cochrane Handbook for Systematic Reviews of Interventions*. 2008,  
41 435 Chichester, UK: John Wiley & Sons.
- 42 436 38. Sterne, J.A., et al., *ROBINS-I: a tool for assessing risk of bias in non-randomised studies of*  
43 437 *interventions*. British Medical Journal, 2016. **355**: p. i4919.
- 44 438 39. M., D., *Methods for the economic evaluation of health care programmes*. 2nd Edition ed, ed.  
45 439 O.U. Press. 1997.
- 46 440 40. Duval, S. and R. Tweedie, *Trim and fill: A simple funnel-plot-based method of testing and*  
47 441 *adjusting for publication bias in meta-analysis*. Biometrics, 2000. **56**(2): p. 455-63.
- 48 442 41. Guyatt, G.H., et al., *GRADE: an emerging consensus on rating quality of evidence and strength of*  
49 443 *recommendations*. British Medical Journal, 2008. **336**(7650): p. 924-6.

- 1  
2  
3 444 42. Silagy, C.A., P. Middleton, and S. Hopewell, *Publishing protocols of systematic reviews: comparing what was done to what was planned*. Journal of the American Medical Association,  
4 445  
5 446 2002. **287**(21): p. 2831-4.  
6

7 447

8  
9 448  
10  
11  
12  
13  
14  
15  
16  
17  
18  
19  
20  
21  
22  
23  
24  
25  
26  
27  
28  
29  
30  
31  
32  
33  
34  
35  
36  
37  
38  
39  
40  
41  
42  
43  
44  
45  
46  
47  
48  
49  
50  
51  
52  
53  
54  
55  
56  
57  
58  
59  
60

1  
2  
3 449 **Figure Legends**  
4

5 450 **Figure 1. Mapping the demonstrated benefits and risks of sharing EHR with patients across the six**  
6 **domains of quality of care, as previously defined by the Institute of Medicine analytical framework**  
7 **[12].** Subgroup analysis will be performed by domain of quality of care domain and by time scale.  
8  
9

10  
11  
12  
13  
14  
15  
16  
17  
18  
19  
20  
21  
22  
23  
24  
25  
26  
27  
28  
29  
30  
31  
32  
33  
34  
35  
36  
37  
38  
39  
40  
41  
42  
43  
44  
45  
46  
47  
48  
49  
50  
51  
52  
53  
54  
55  
56  
57  
58  
59  
60

For peer review only



Figure 1. Mapping the demonstrated benefits and risks of sharing EHR with patients across the six domains of quality of care, as defined by the Institute of Medicine analytical framework. Subgroup analysis will be performed by domain of quality of care domain and by time scale.

326x170mm (300 x 300 DPI)

Review only

**PRISMA-P (Preferred Reporting Items for Systematic review and Meta-Analysis Protocols) 2015 checklist: recommended items to address in a systematic review protocol\***

| Section and topic                 | Item No | Checklist item                                                                                                                                                                                                                | Page           |
|-----------------------------------|---------|-------------------------------------------------------------------------------------------------------------------------------------------------------------------------------------------------------------------------------|----------------|
| <b>ADMINISTRATIVE INFORMATION</b> |         |                                                                                                                                                                                                                               |                |
| Title:                            |         |                                                                                                                                                                                                                               |                |
| Identification                    | 1a      | Identify the report as a protocol of a systematic review                                                                                                                                                                      | 1, 2,          |
| Update                            | 1b      | If the protocol is for an update of a previous systematic review, identify as such                                                                                                                                            | Not applicable |
| Registration                      | 2       | If registered, provide the name of the registry (such as PROSPERO) and registration number                                                                                                                                    | 2              |
| Authors:                          |         |                                                                                                                                                                                                                               |                |
| Contact                           | 3a      | Provide name, institutional affiliation, e-mail address of all protocol authors; provide physical mailing address of corresponding author                                                                                     | 1              |
| Contributions                     | 3b      | Describe contributions of protocol authors and identify the guarantor of the review                                                                                                                                           | 12             |
| Amendments                        | 4       | If the protocol represents an amendment of a previously completed or published protocol, identify as such and list changes; otherwise, state plan for documenting important protocol amendments                               | Not applicable |
| Support:                          |         |                                                                                                                                                                                                                               |                |
| Sources                           | 5a      | Indicate sources of financial or other support for the review                                                                                                                                                                 | 12             |
| Sponsor                           | 5b      | Provide name for the review funder and/or sponsor                                                                                                                                                                             | 12             |
| Role of sponsor or funder         | 5c      | Describe roles of funder(s), sponsor(s), and/or institution(s), if any, in developing the protocol                                                                                                                            | 12             |
| <b>INTRODUCTION</b>               |         |                                                                                                                                                                                                                               |                |
| Rationale                         | 6       | Describe the rationale for the review in the context of what is already known                                                                                                                                                 | 4-6            |
| Objectives                        | 7       | Provide an explicit statement of the question(s) the review will address with reference to participants, interventions, comparators, and outcomes (PICO)                                                                      | 7              |
| <b>METHODS</b>                    |         |                                                                                                                                                                                                                               |                |
| Eligibility criteria              | 8       | Specify the study characteristics (such as PICO, study design, setting, time frame) and report characteristics (such as years considered, language, publication status) to be used as criteria for eligibility for the review | 6,7,17         |
| Information sources               | 9       | Describe all intended information sources (such as electronic databases, contact with study authors, trial registers or other grey literature sources) with planned dates of coverage                                         | 6,7            |
| Search strategy                   | 10      | Present draft of search strategy to be used for at least one electronic database, including planned limits, such that it could be repeated                                                                                    | 6, 13-16       |

|                                    |     |                                                                                                                                                                                                                                                  |     |
|------------------------------------|-----|--------------------------------------------------------------------------------------------------------------------------------------------------------------------------------------------------------------------------------------------------|-----|
| Study records:                     |     |                                                                                                                                                                                                                                                  |     |
| Data management                    | 11a | Describe the mechanism(s) that will be used to manage records and data throughout the review                                                                                                                                                     | 6-9 |
| Selection process                  | 11b | State the process that will be used for selecting studies (such as two independent reviewers) through each phase of the review (that is, screening, eligibility and inclusion in meta-analysis)                                                  | 2,8 |
| Data collection process            | 11c | Describe planned method of extracting data from reports (such as piloting forms, done independently, in duplicate), any processes for obtaining and confirming data from investigators                                                           | 8   |
| Data items                         | 12  | List and define all variables for which data will be sought (such as PICO items, funding sources), any pre-planned data assumptions and simplifications                                                                                          | 7   |
| Outcomes and prioritization        | 13  | List and define all outcomes for which data will be sought, including prioritization of main and additional outcomes, with rationale                                                                                                             | 7   |
| Risk of bias in individual studies | 14  | Describe anticipated methods for assessing risk of bias of individual studies, including whether this will be done at the outcome or study level, or both; state how this information will be used in data synthesis                             | 8-9 |
| Data synthesis                     | 15a | Describe criteria under which study data will be quantitatively synthesised                                                                                                                                                                      | 8   |
|                                    | 15b | If data are appropriate for quantitative synthesis, describe planned summary measures, methods of handling data and methods of combining data from studies, including any planned exploration of consistency (such as $I^2$ , Kendall's $\tau$ ) | 8   |
|                                    | 15c | Describe any proposed additional analyses (such as sensitivity or subgroup analyses, meta-regression)                                                                                                                                            | 8   |
|                                    | 15d | If quantitative synthesis is not appropriate, describe the type of summary planned                                                                                                                                                               | 8   |
| Meta-bias(es)                      | 16  | Specify any planned assessment of meta-bias(es) (such as publication bias across studies, selective reporting within studies)                                                                                                                    | 8   |
| Confidence in cumulative evidence  | 17  | Describe how the strength of the body of evidence will be assessed (such as GRADE)                                                                                                                                                               | 8   |

**\* It is strongly recommended that this checklist be read in conjunction with the PRISMA-P Explanation and Elaboration (cite when available) for important clarification on the items. Amendments to a review protocol should be tracked and dated. The copyright for PRISMA-P (including checklist) is held by the PRISMA-P Group and is distributed under a Creative Commons Attribution Licence 4.0.**

*From: Shamseer L, Moher D, Clarke M, Ghersi D, Liberati A, Petticrew M, Shekelle P, Stewart L, PRISMA-P Group. Preferred reporting items for systematic review and meta-analysis protocols (PRISMA-P) 2015: elaboration and explanation. BMJ. 2015 Jan 2;349(jan02 1):g7647.*
